# Supplementary material for: TMEM106B is a receptor mediating ACE2-independent SARS-CoV-2 cell entry
Source: PubMed Central journal article supplement (PMC10409496; doi:10.1016/j.cell.2023.06.005), 2023-08-03

**Data S1. HDX deuterium uptake plots. Related to Figure 3**

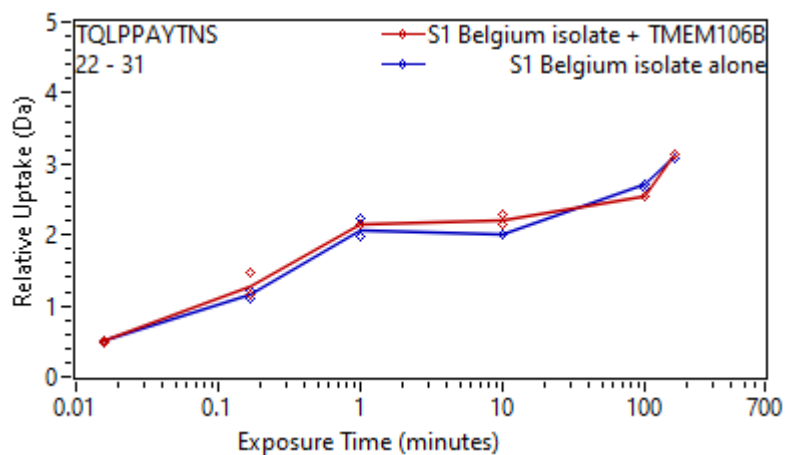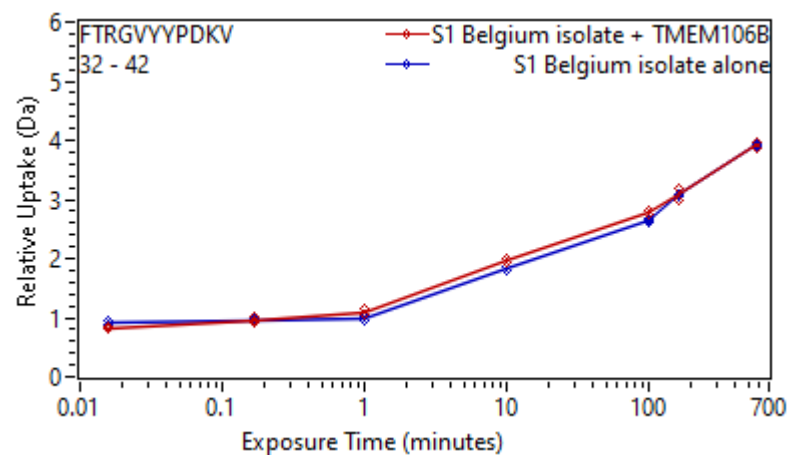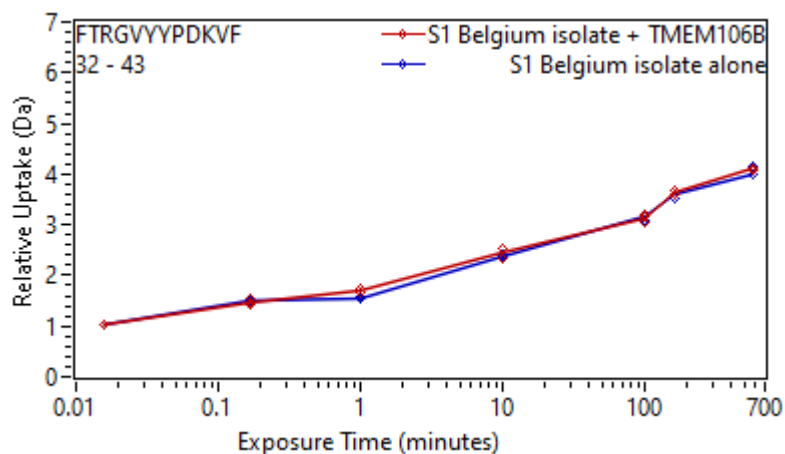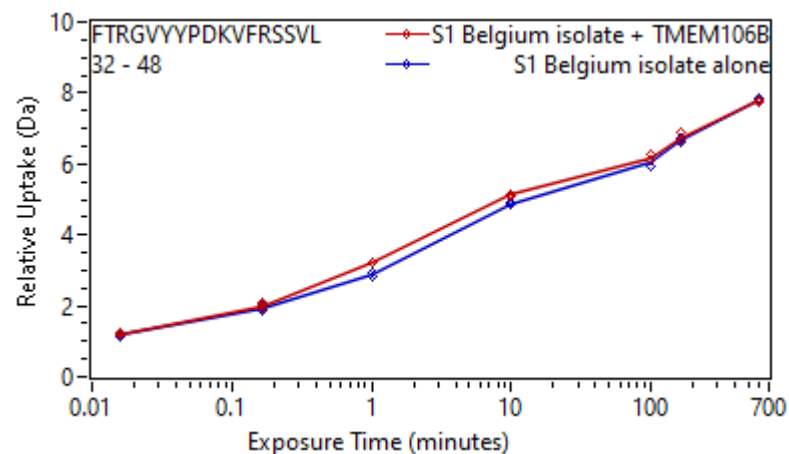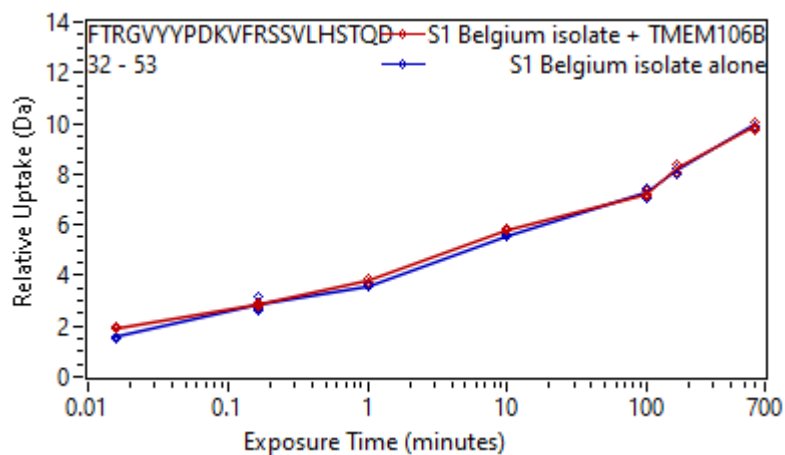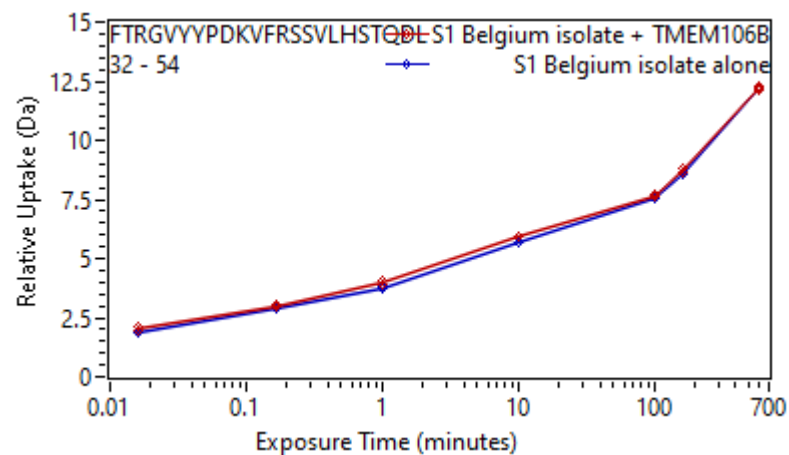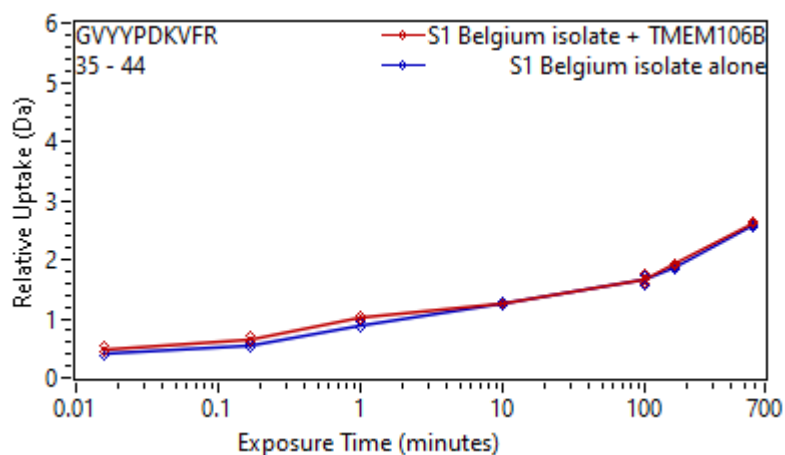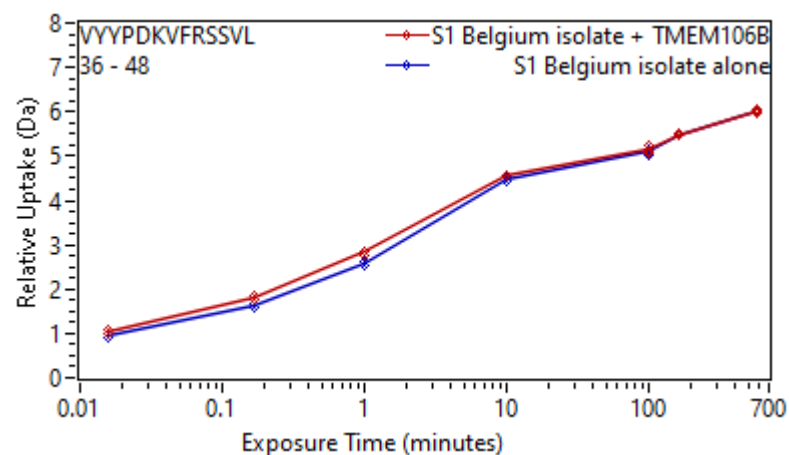

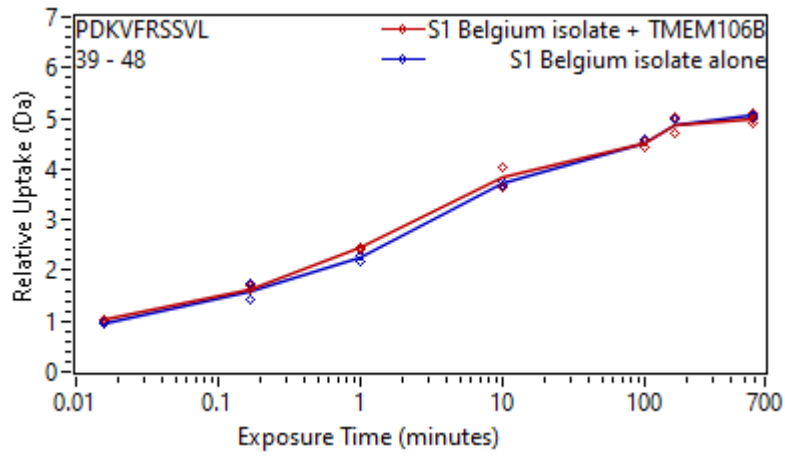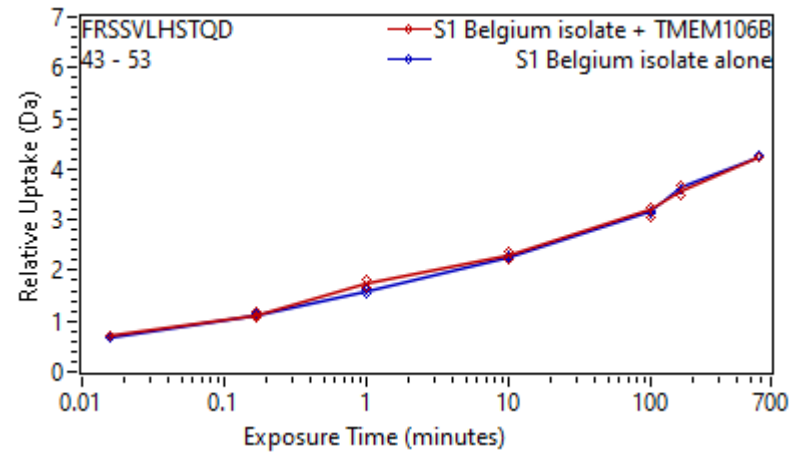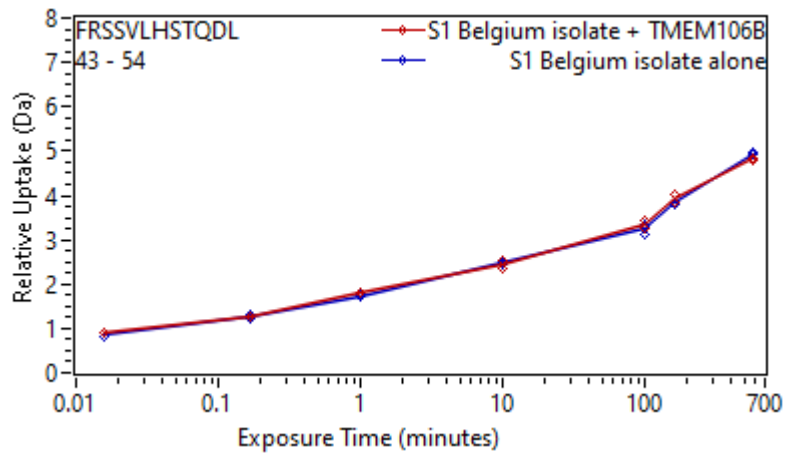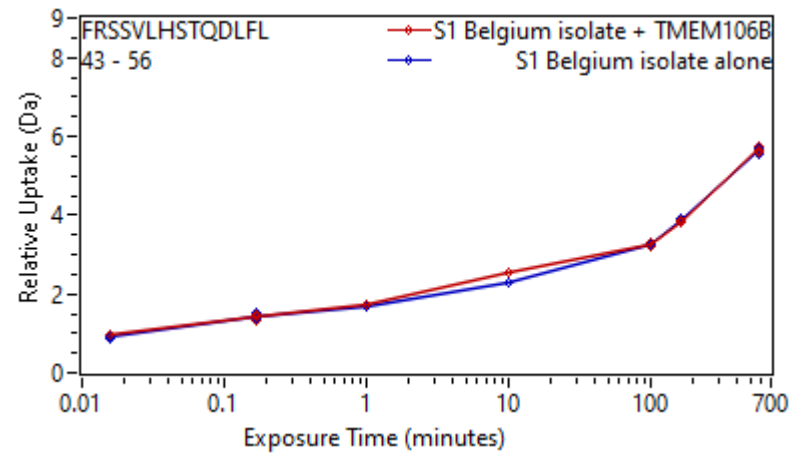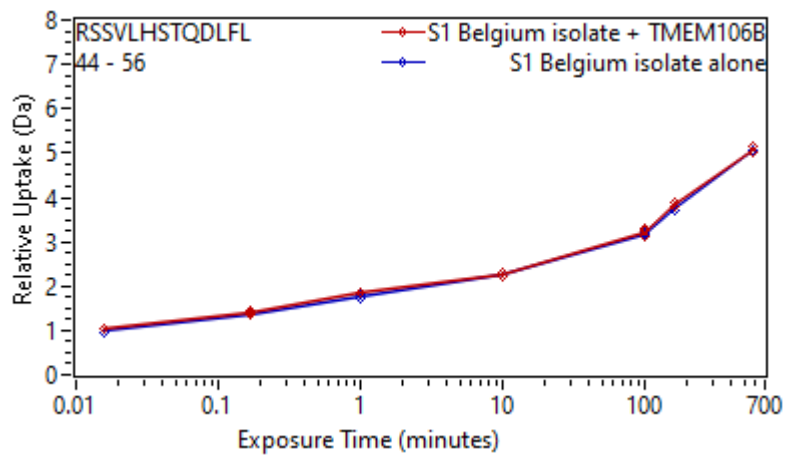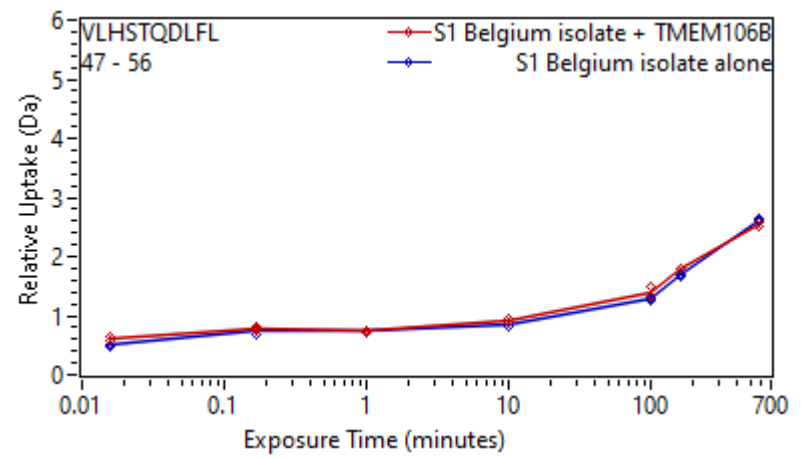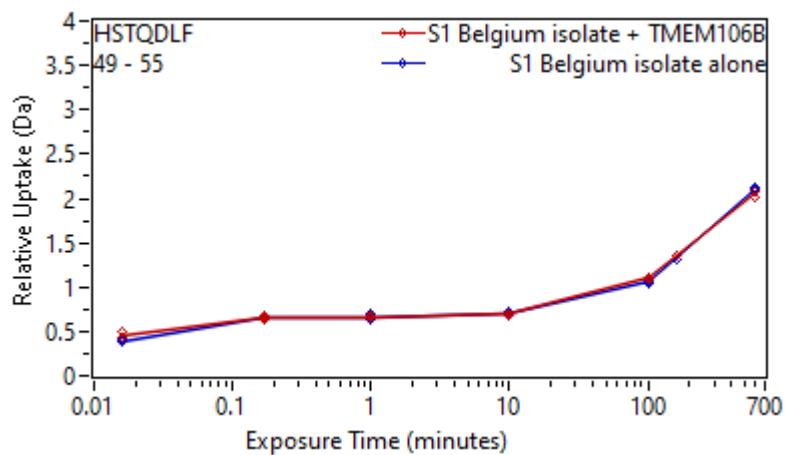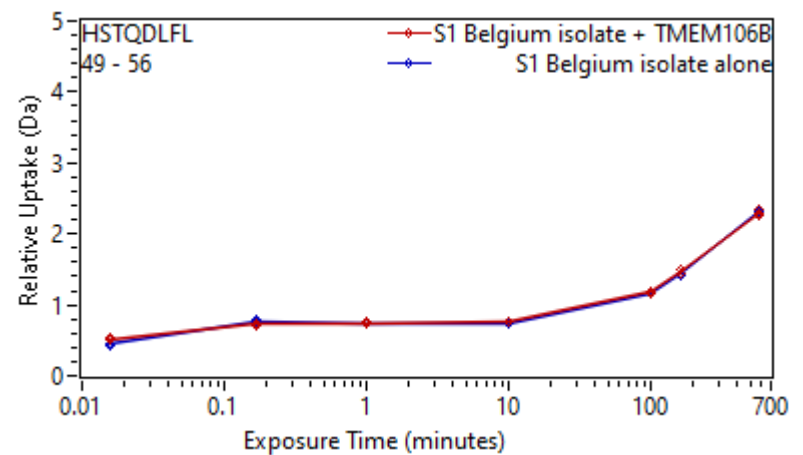

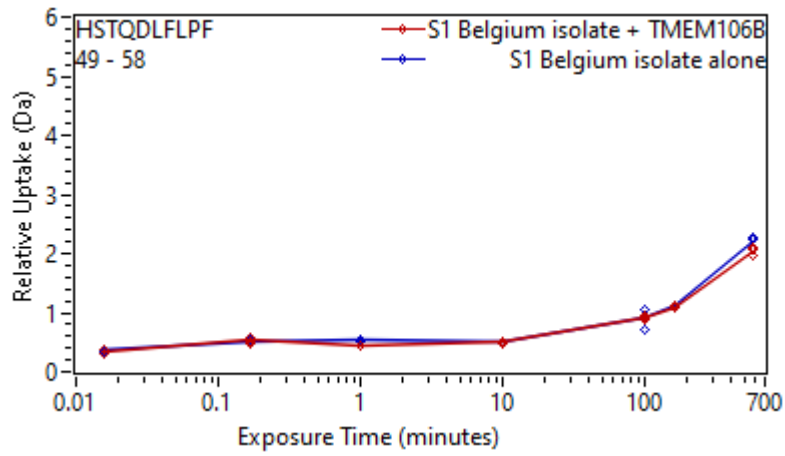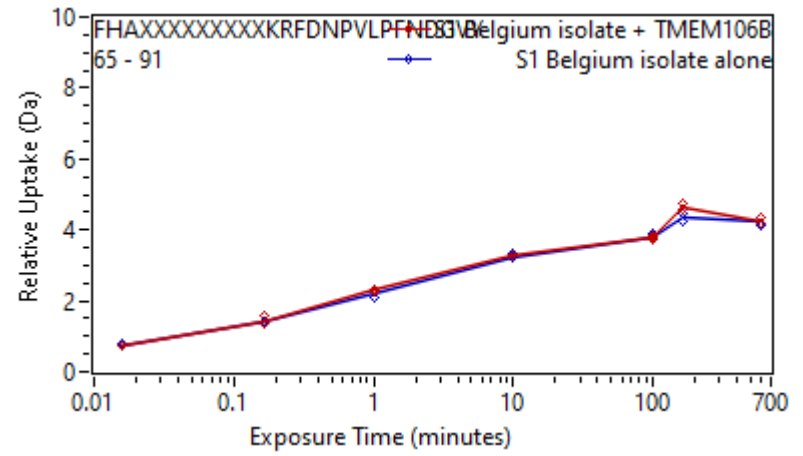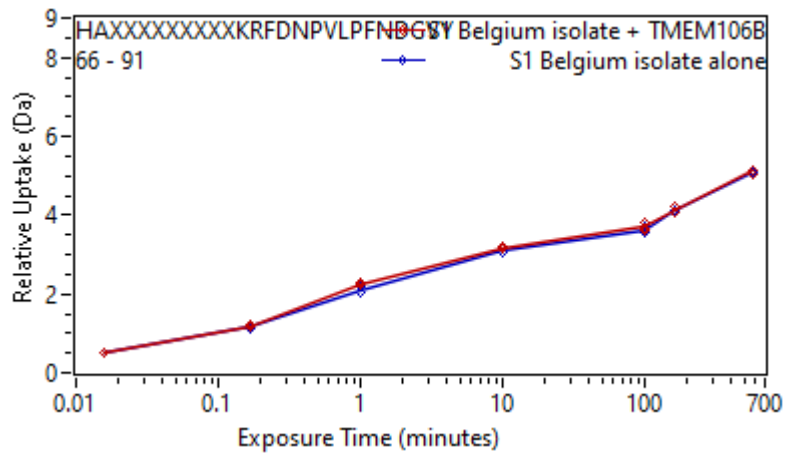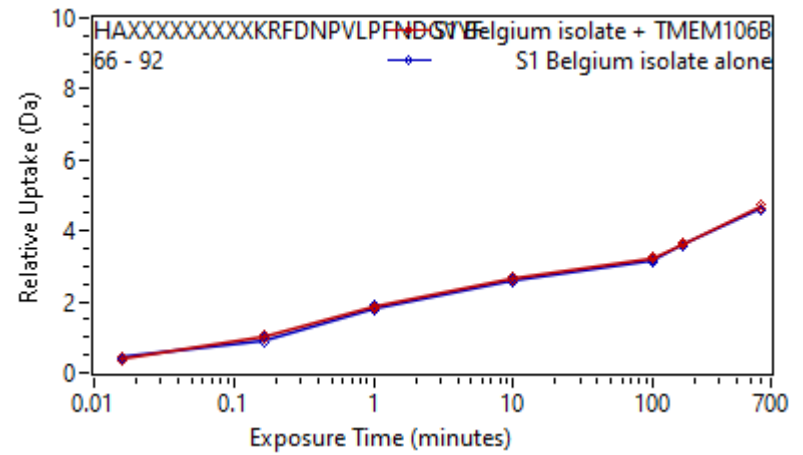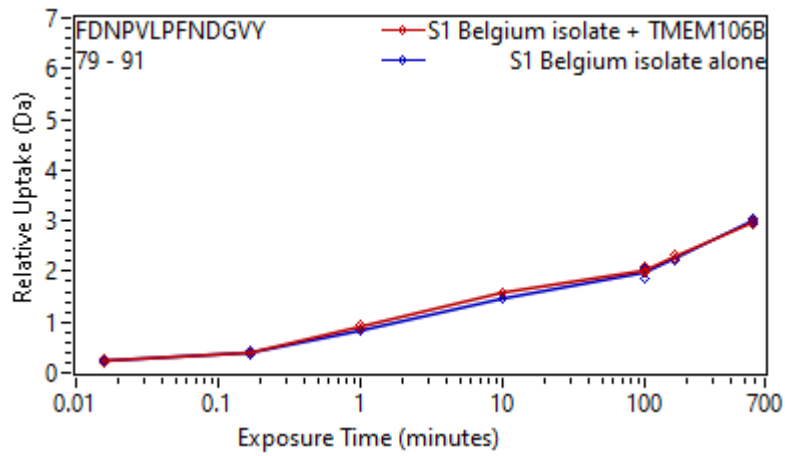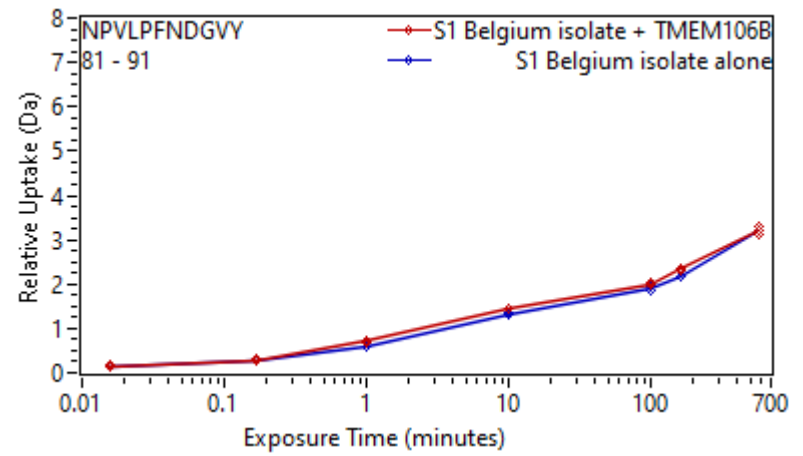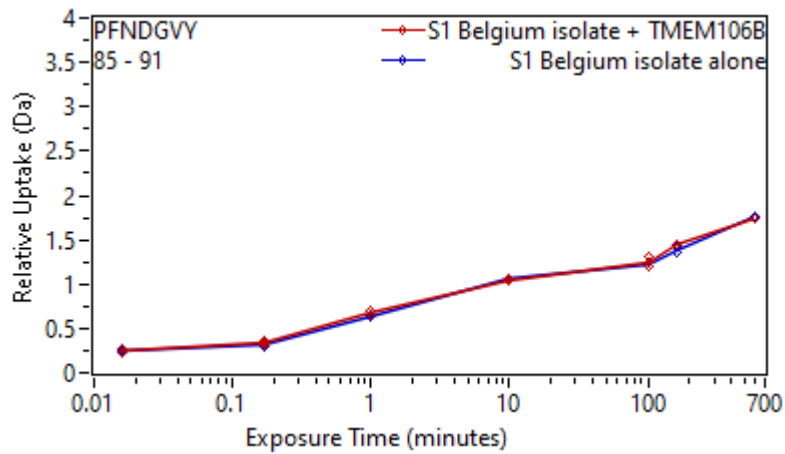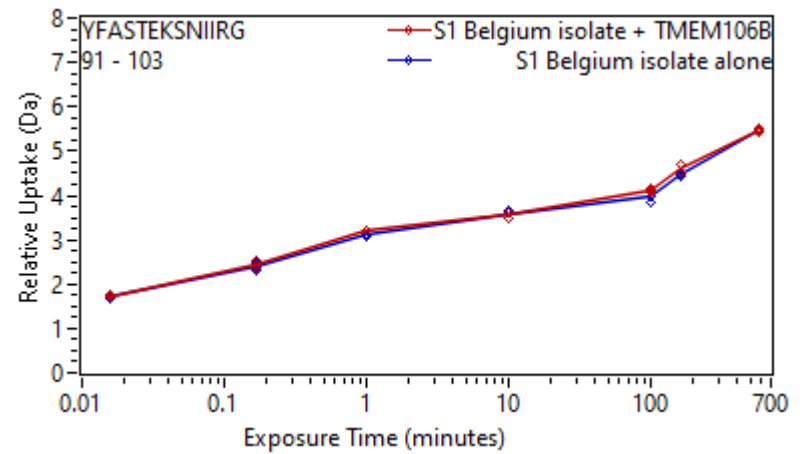

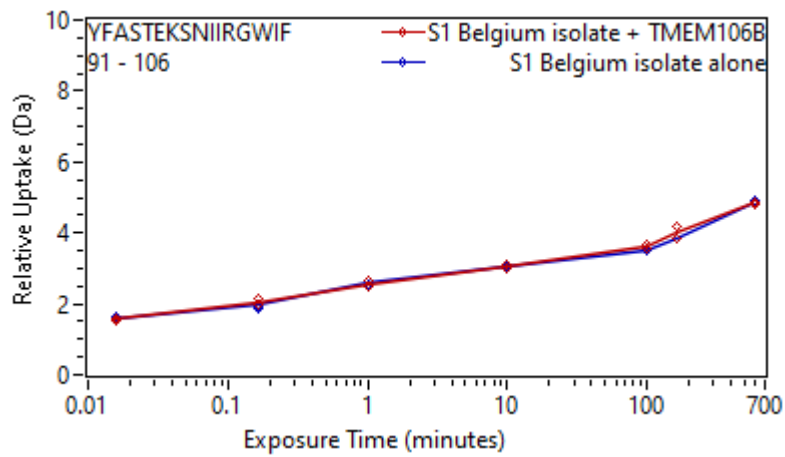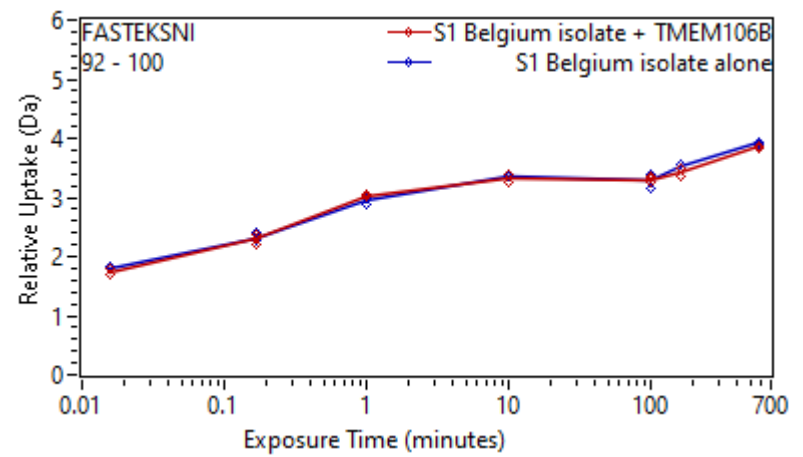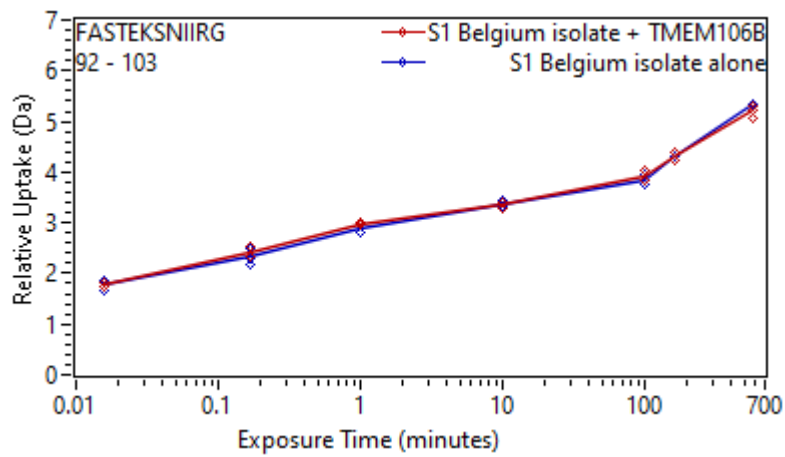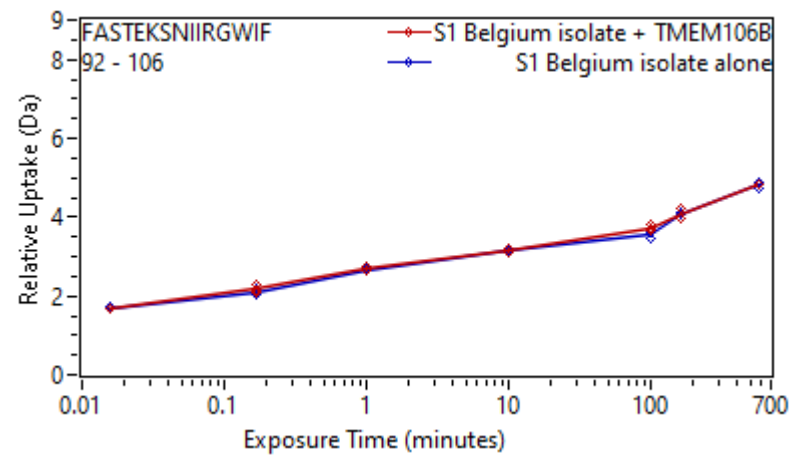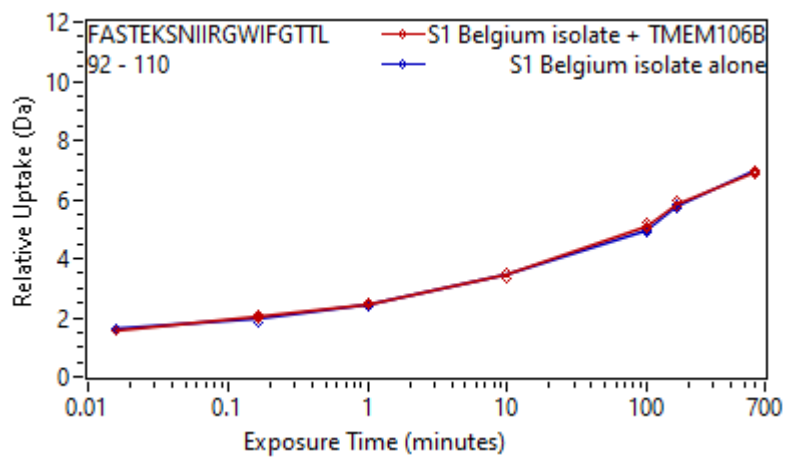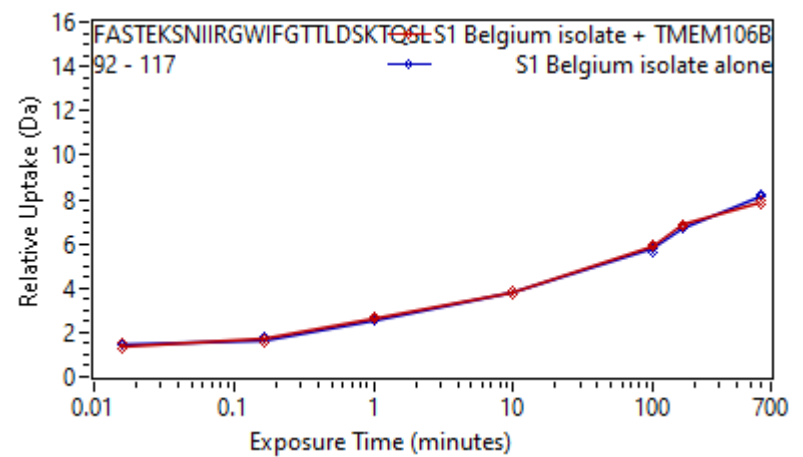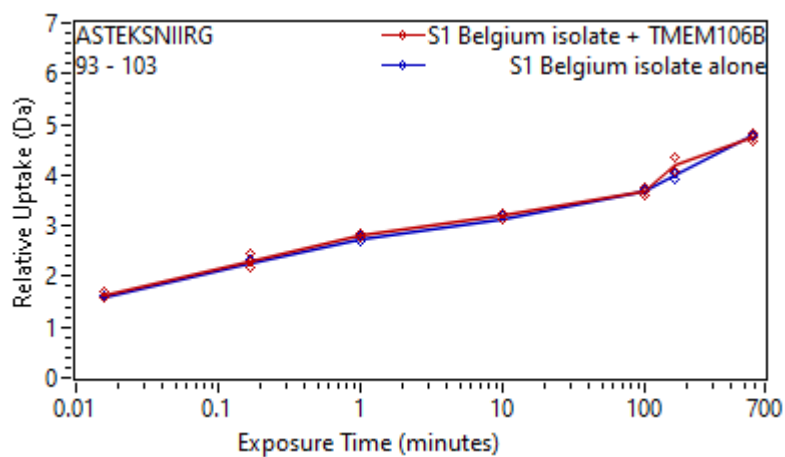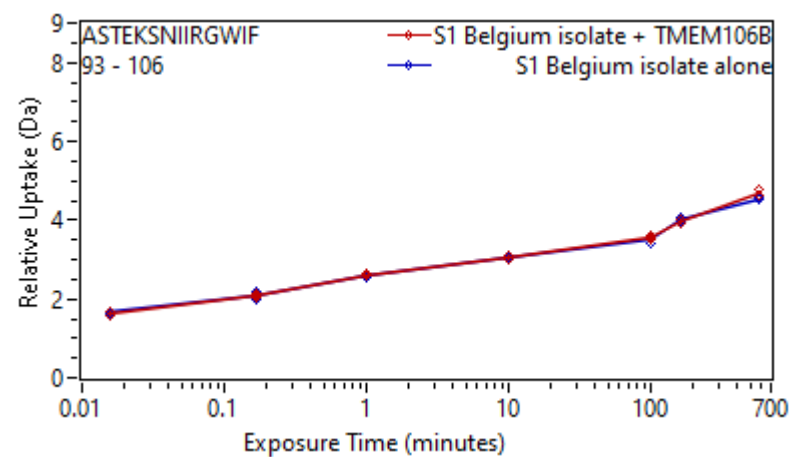

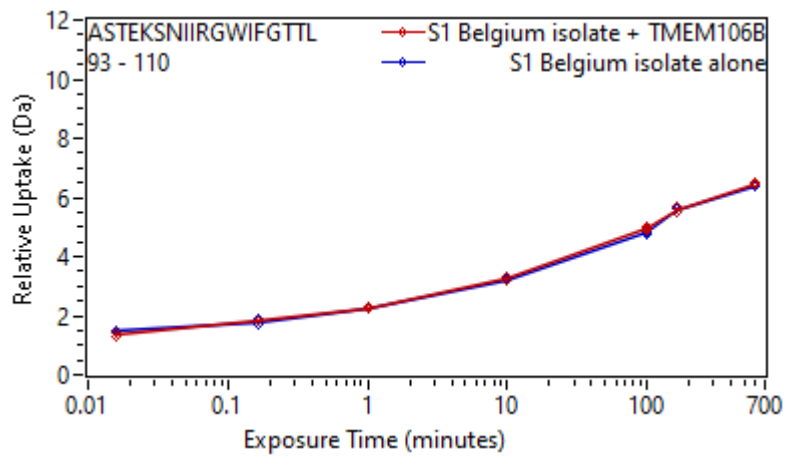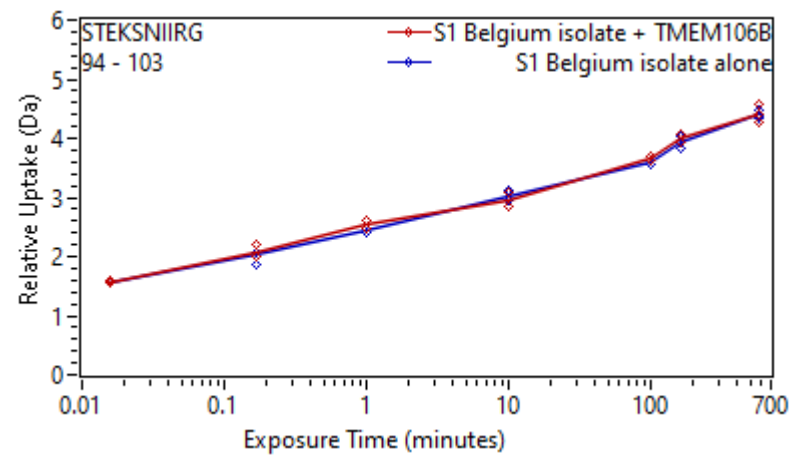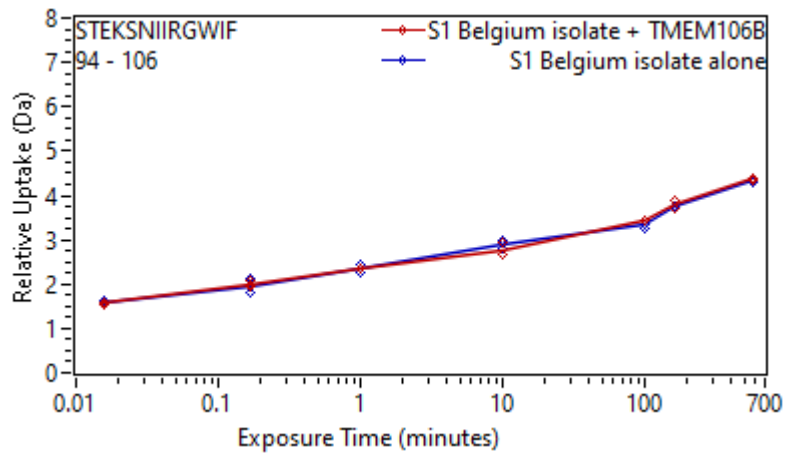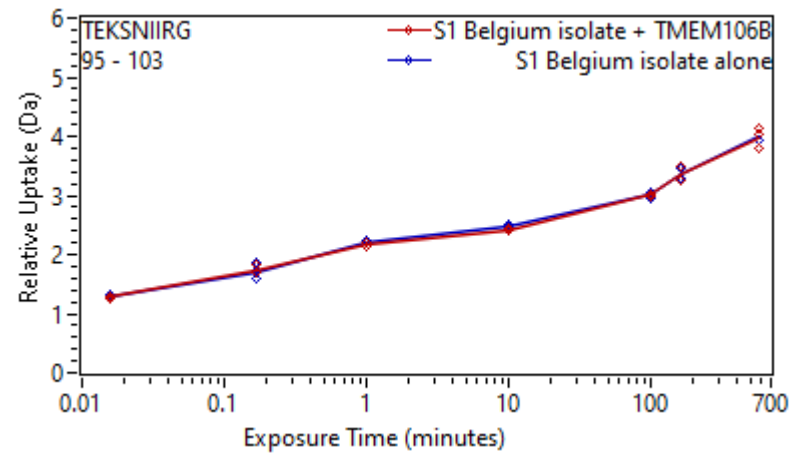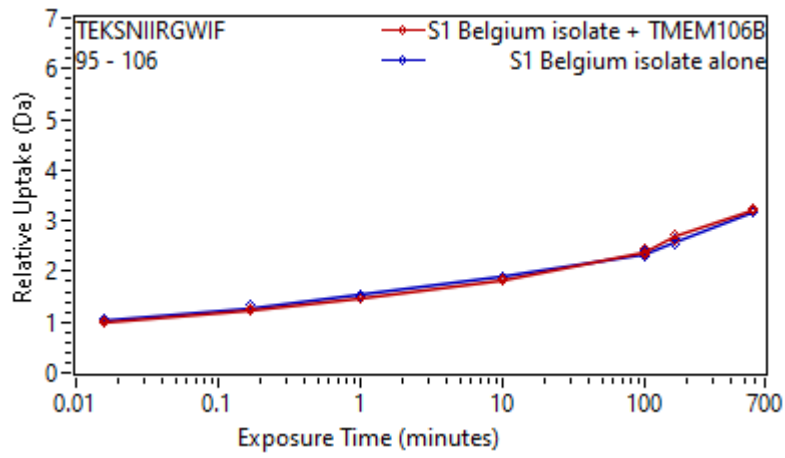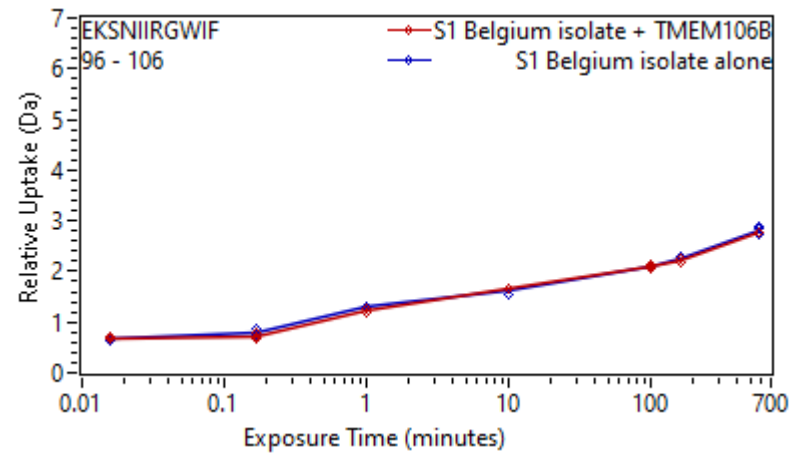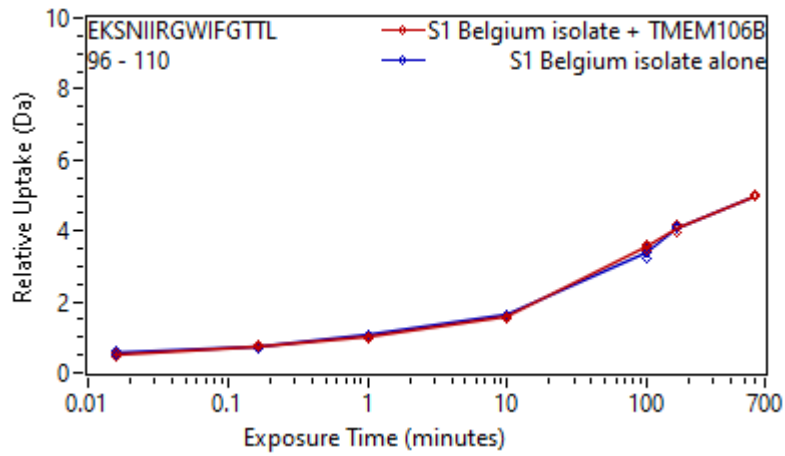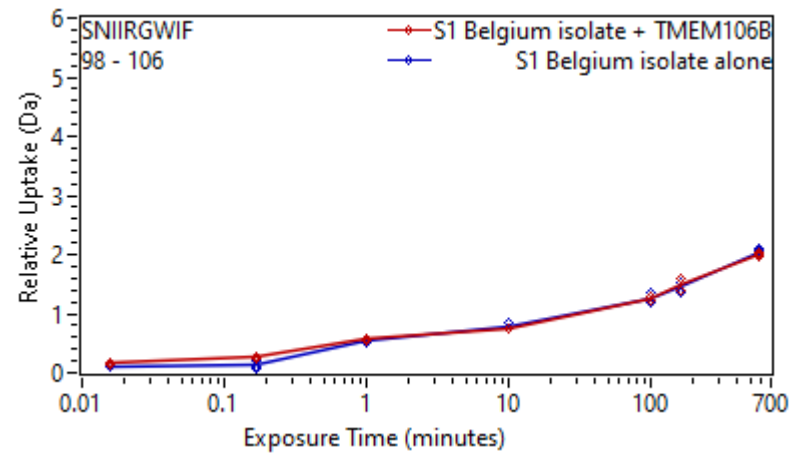

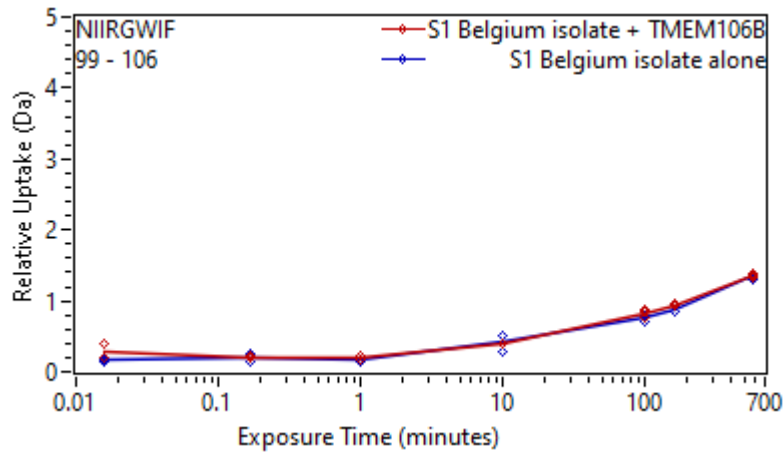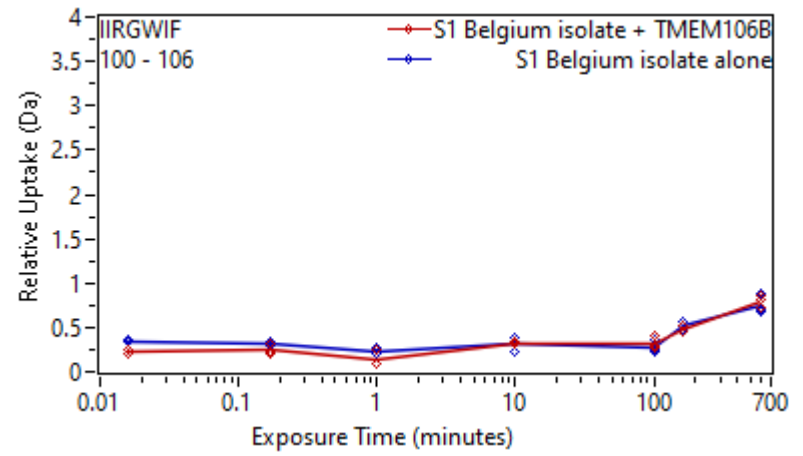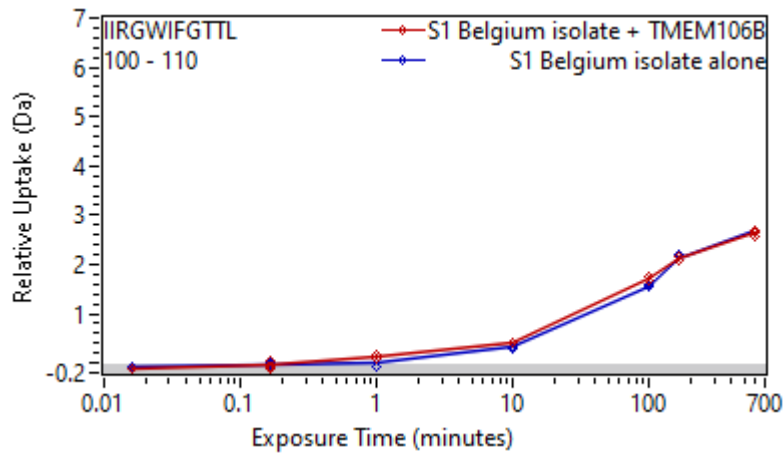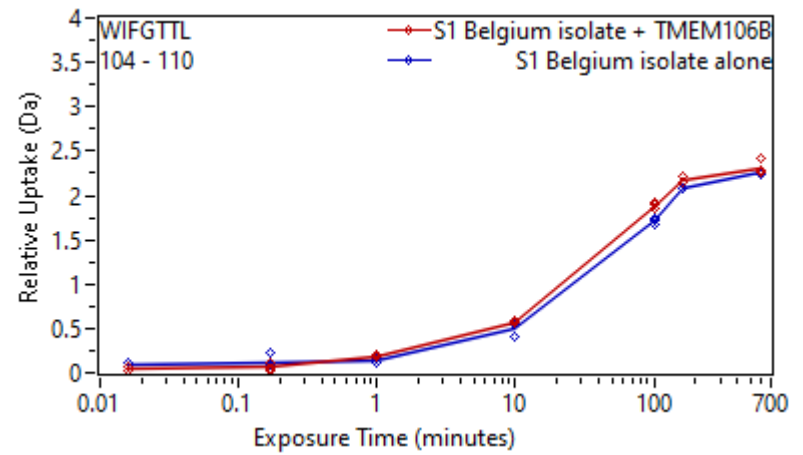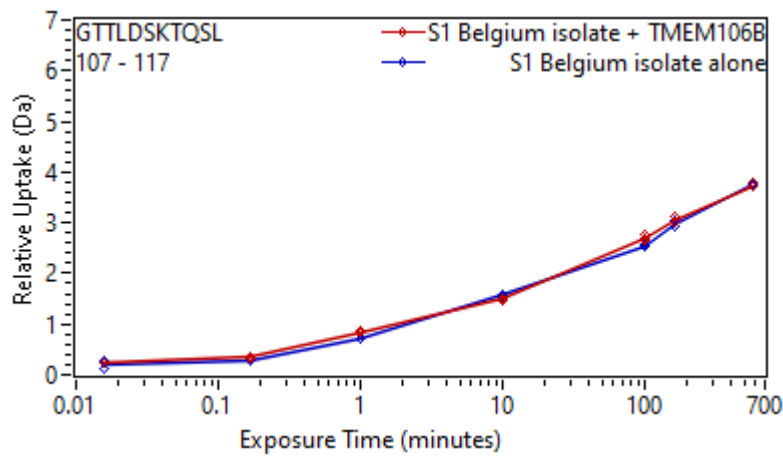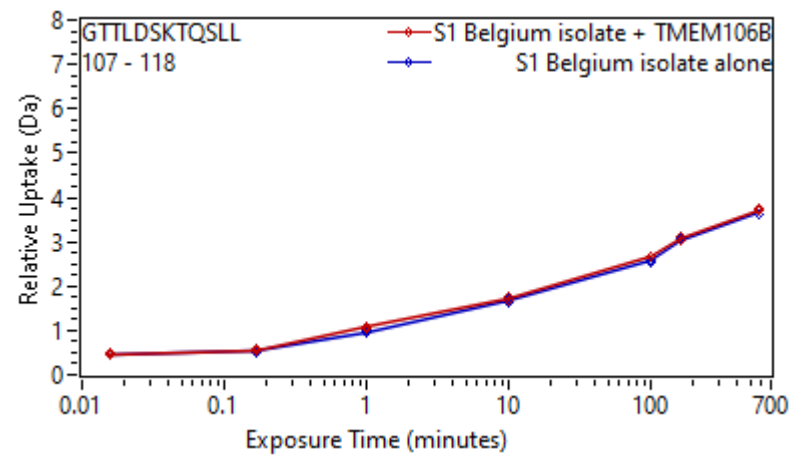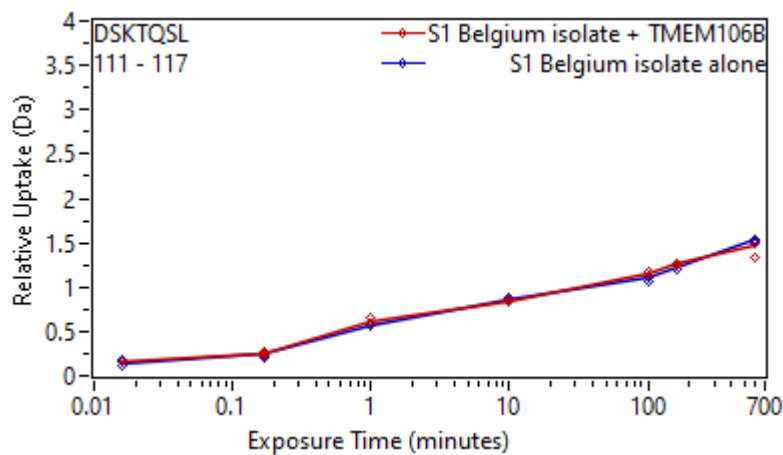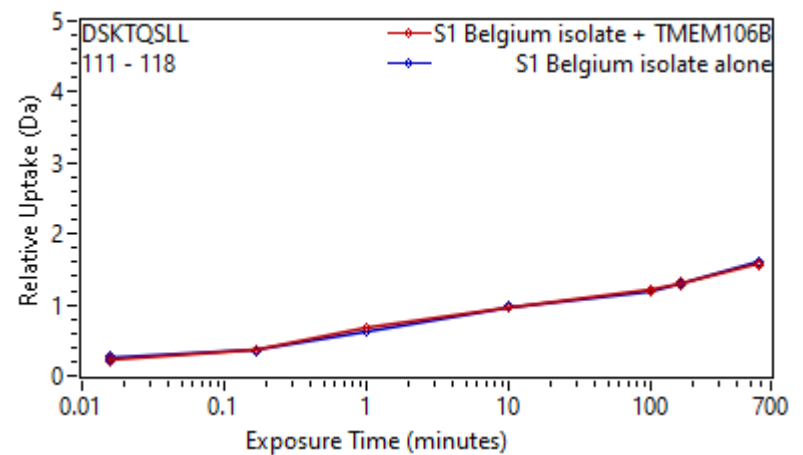

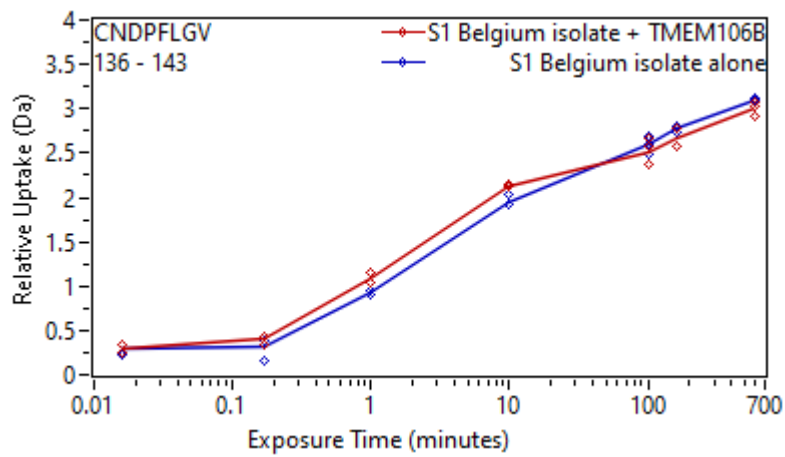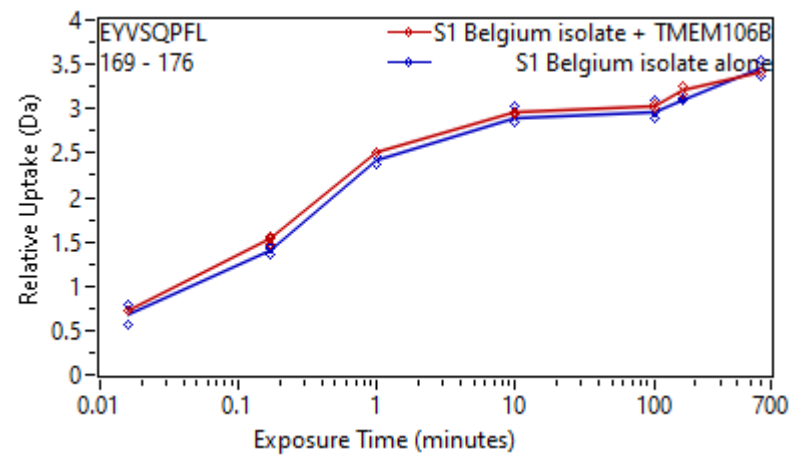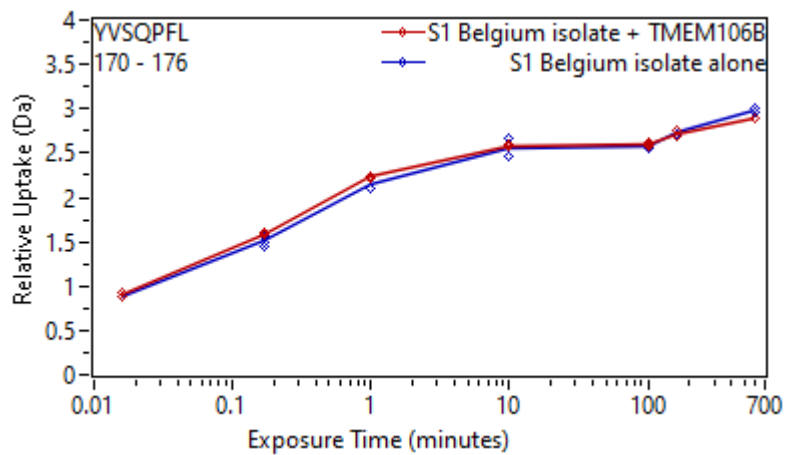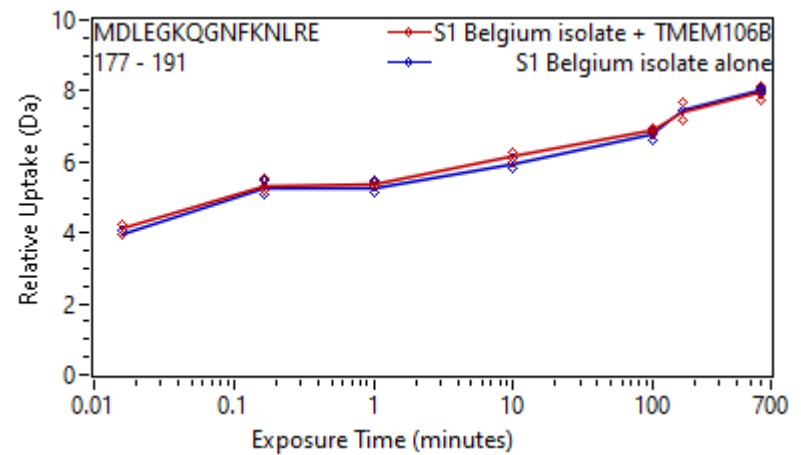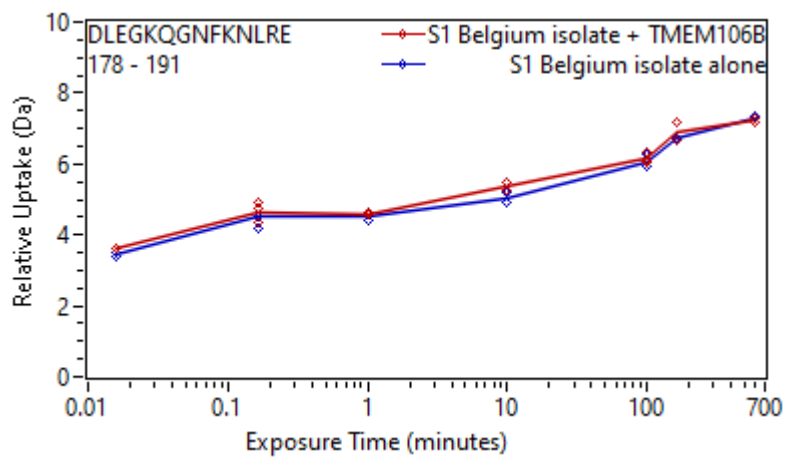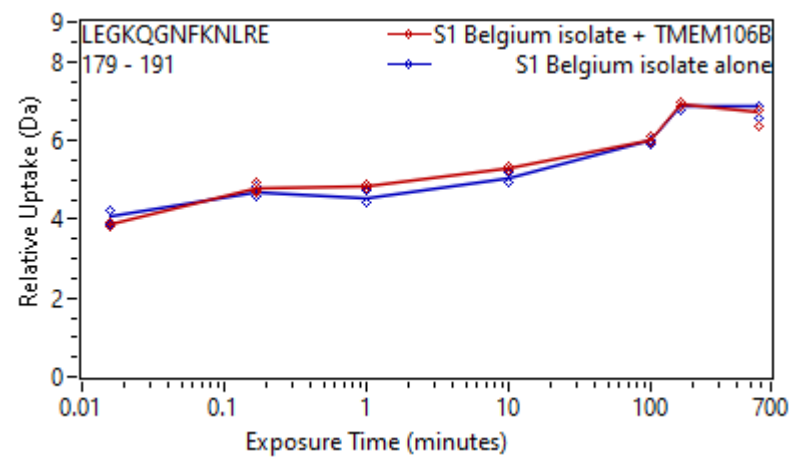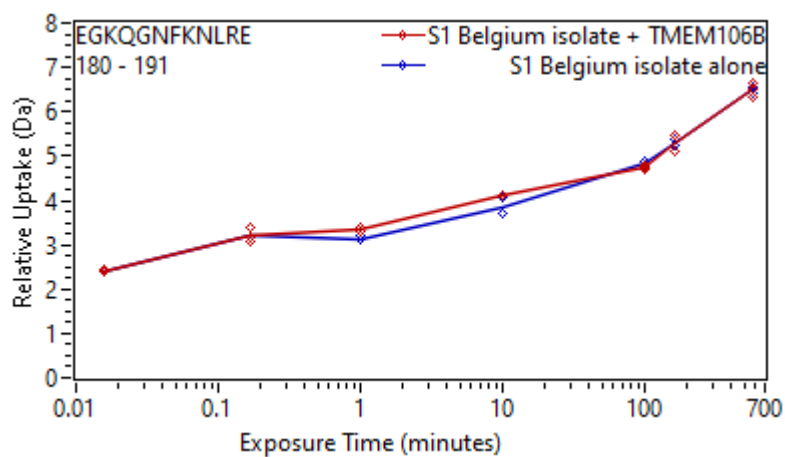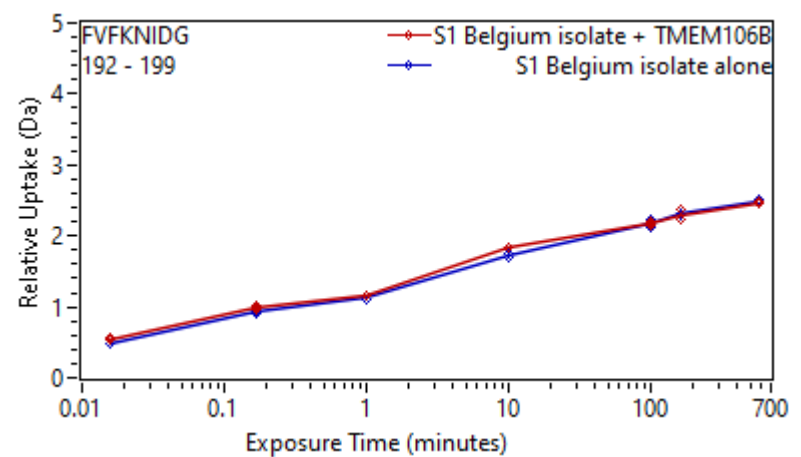

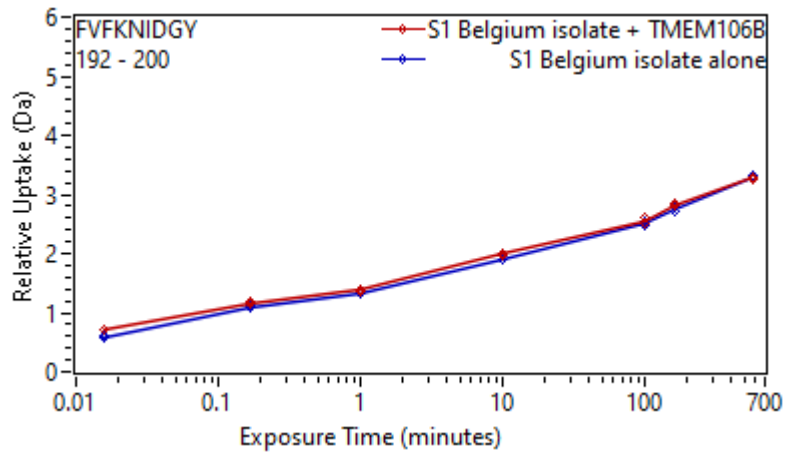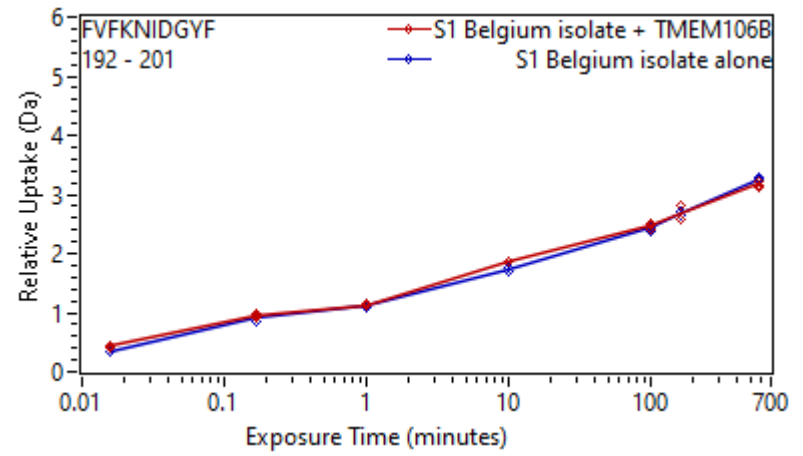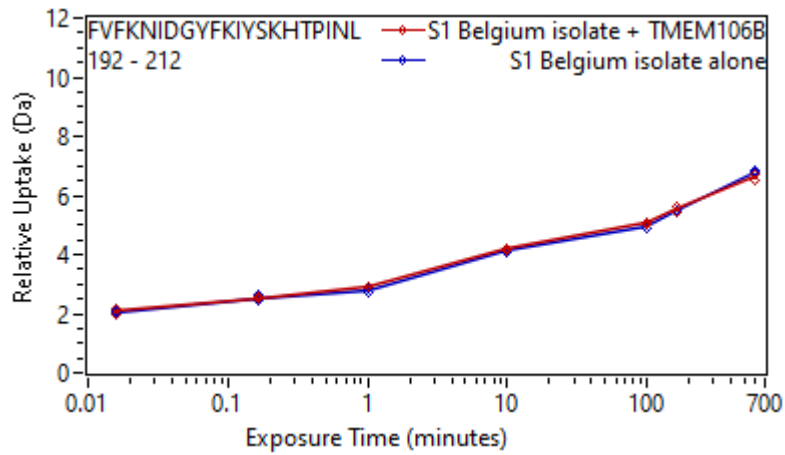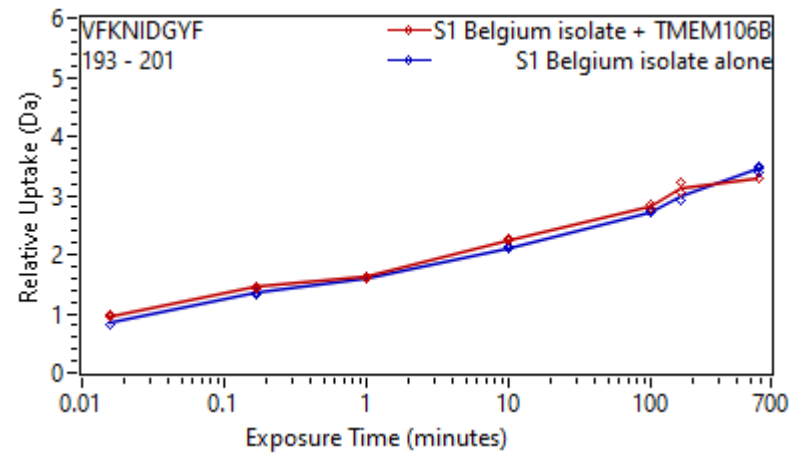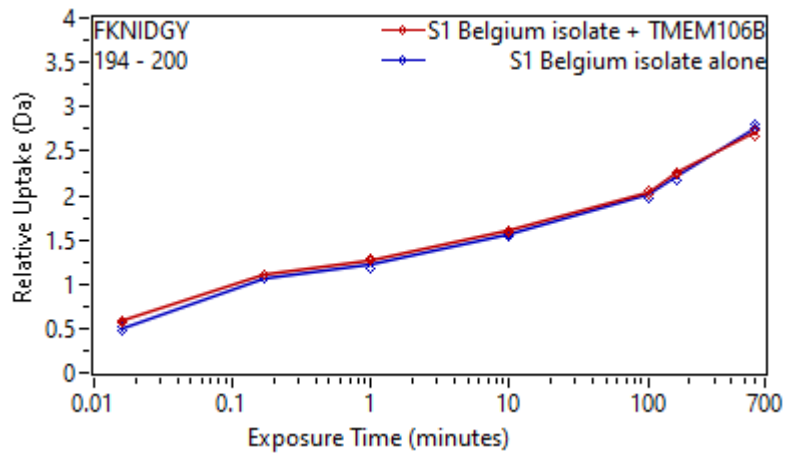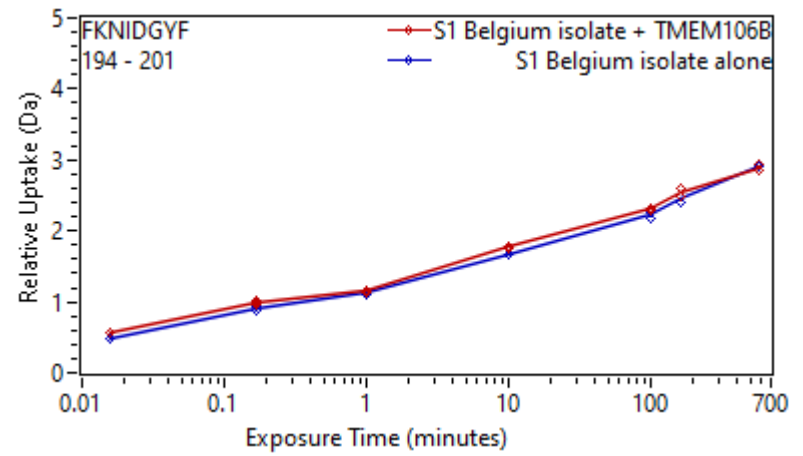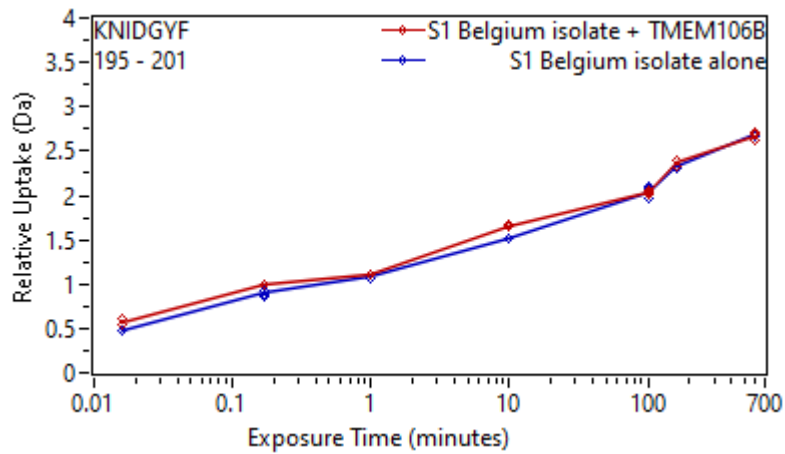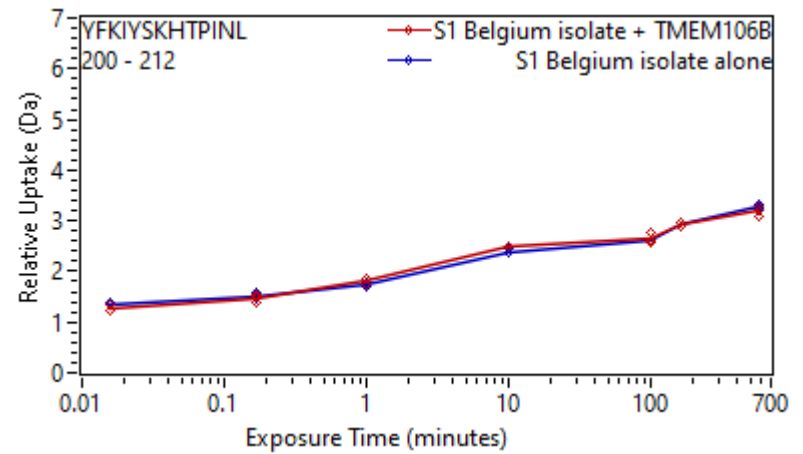



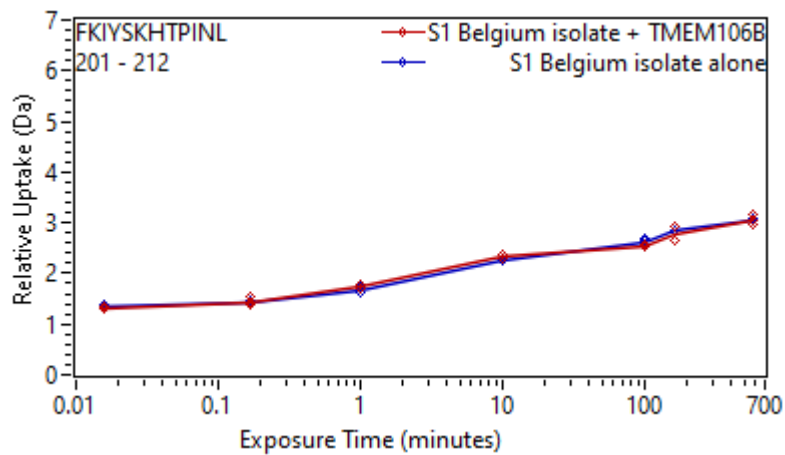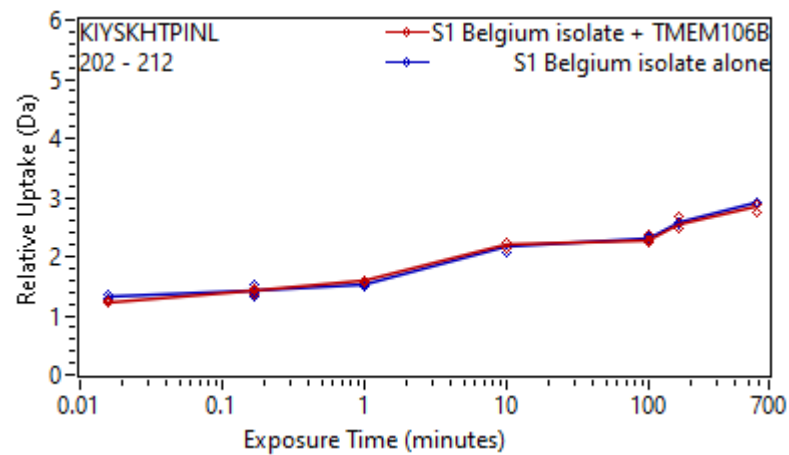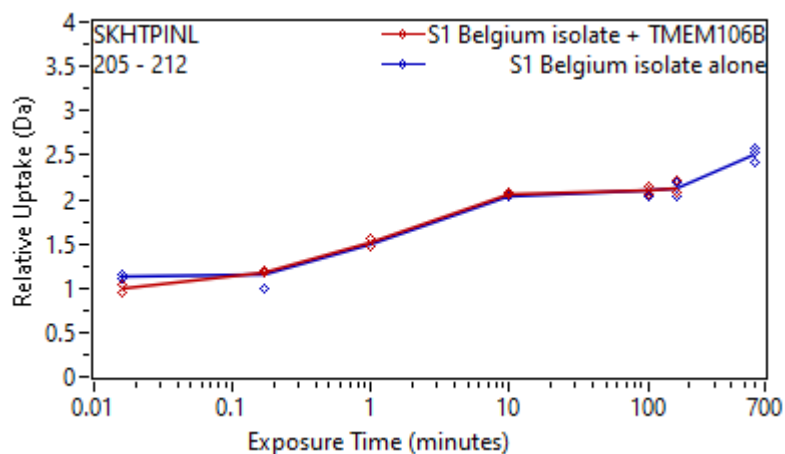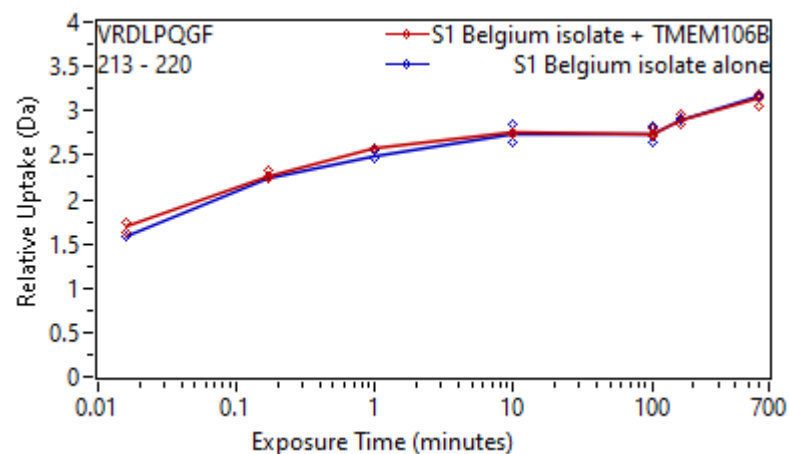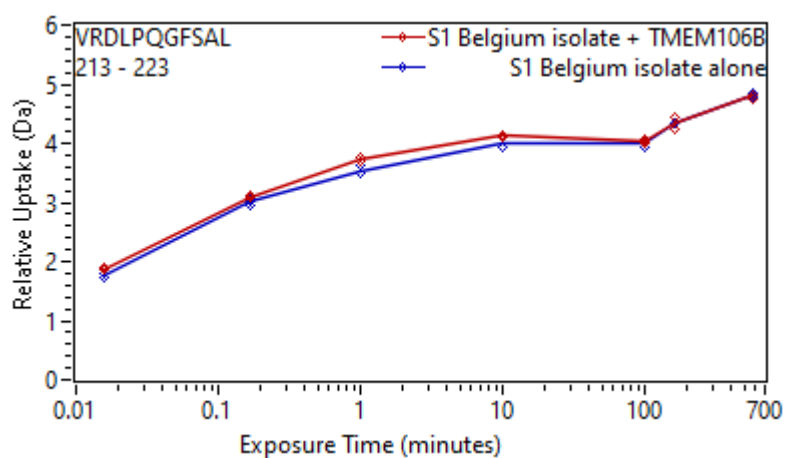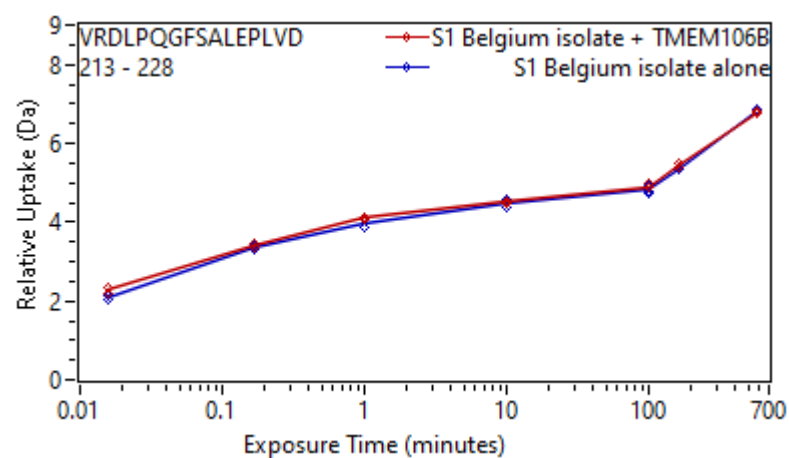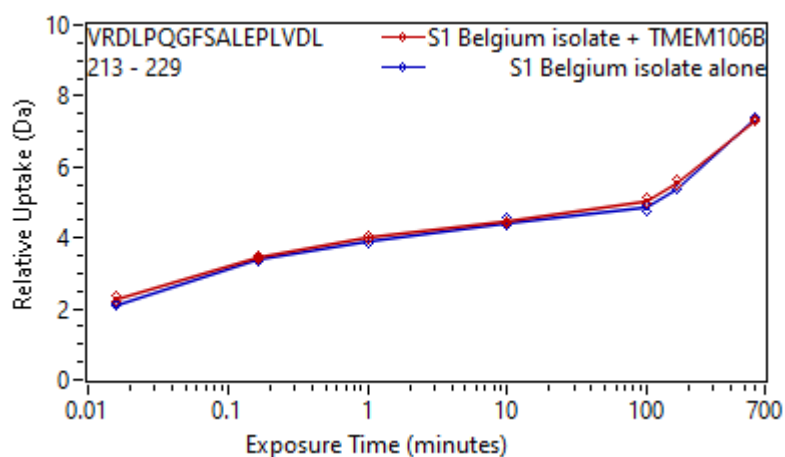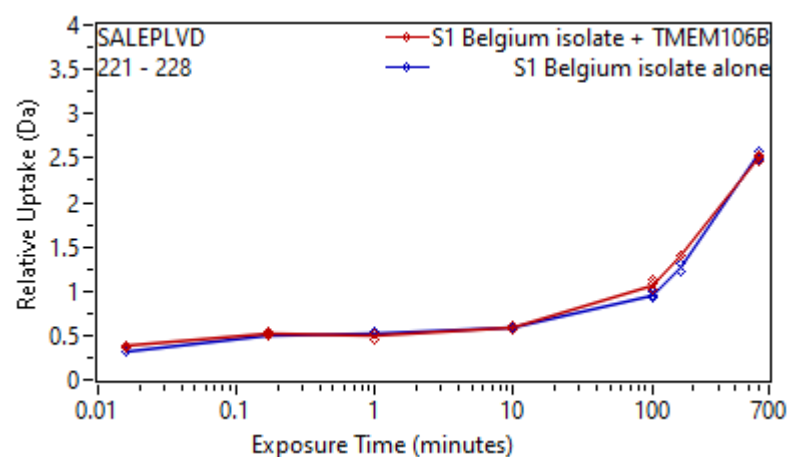

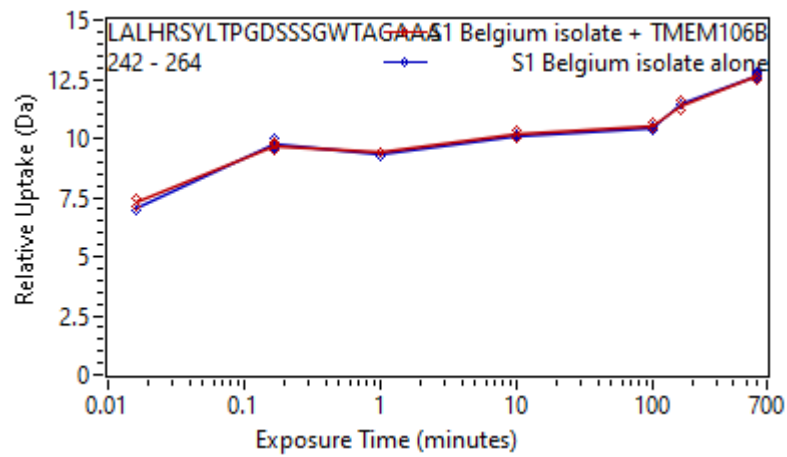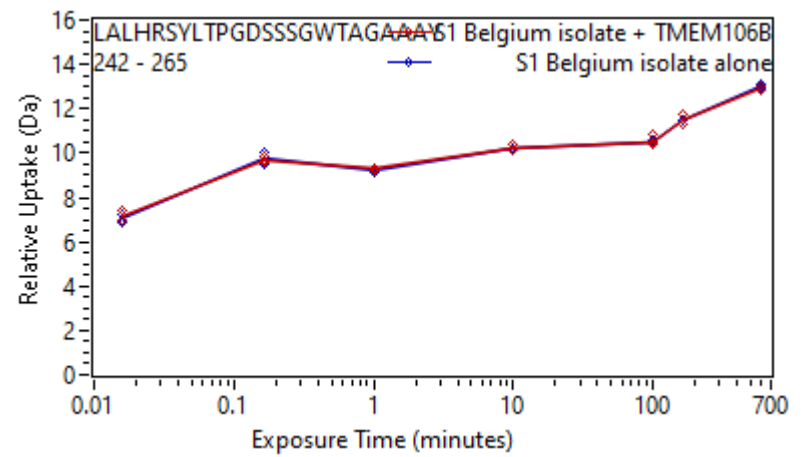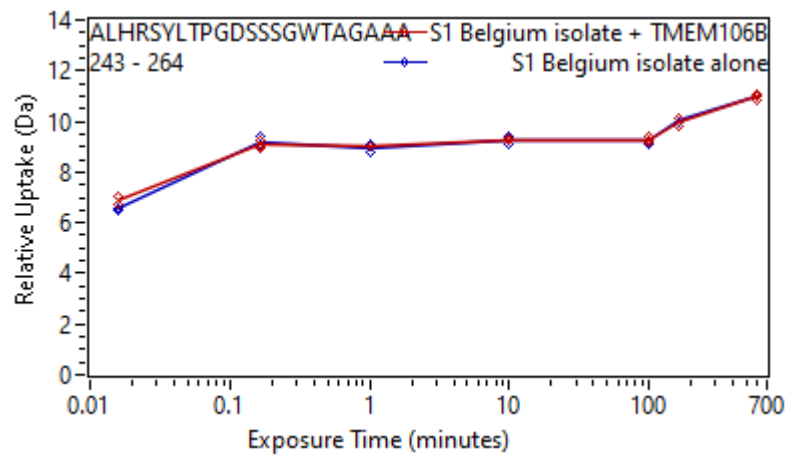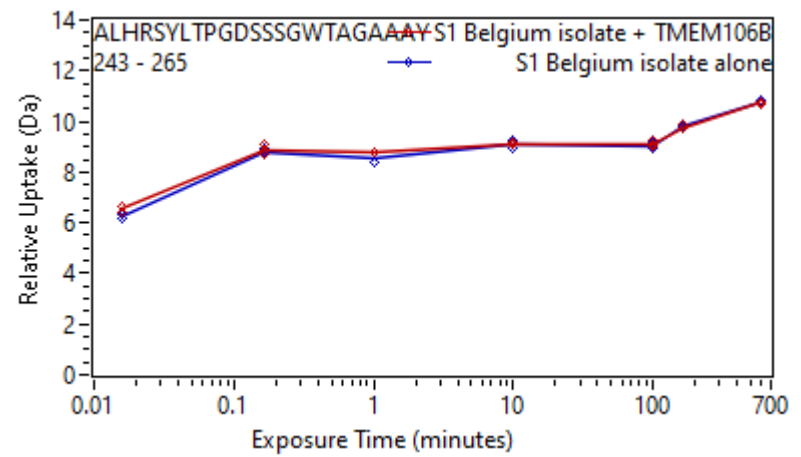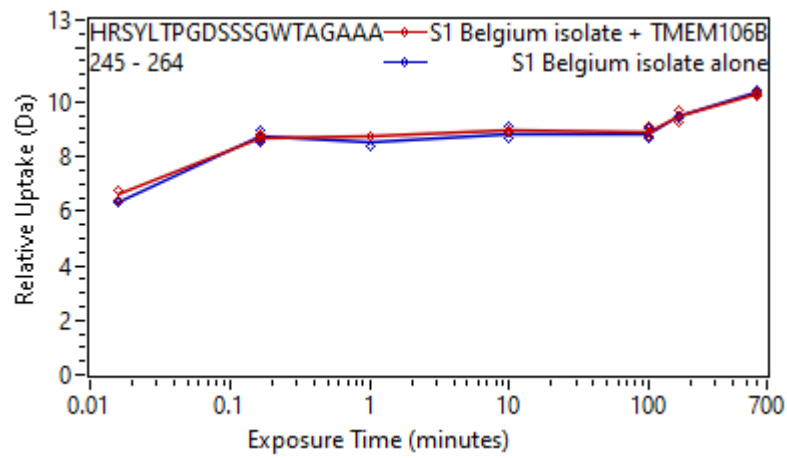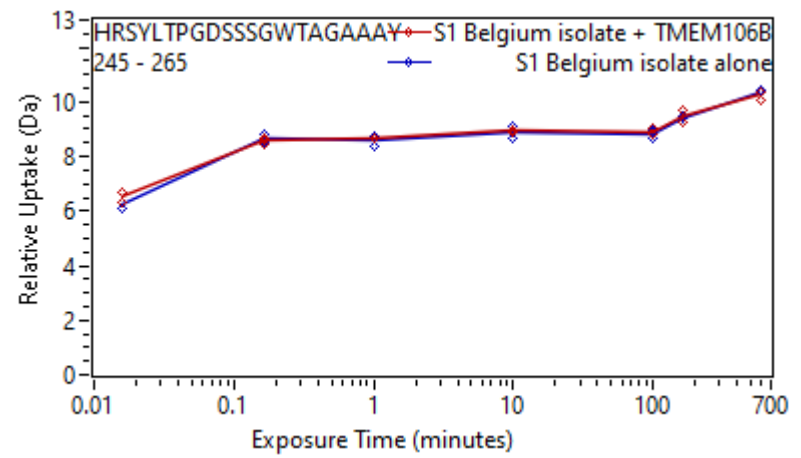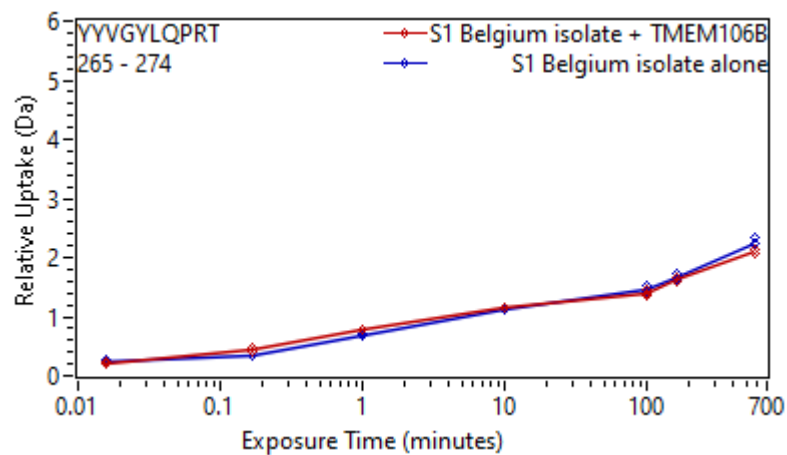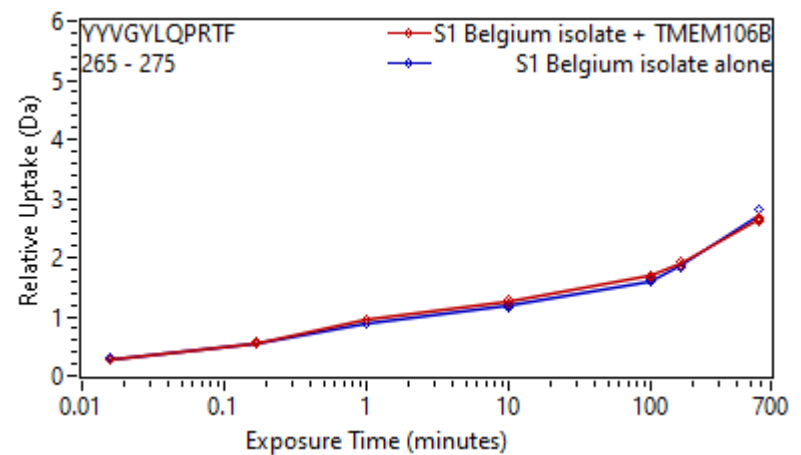

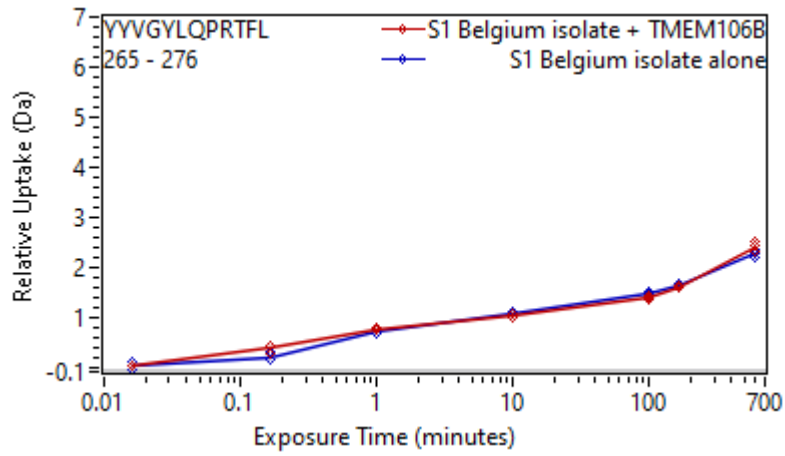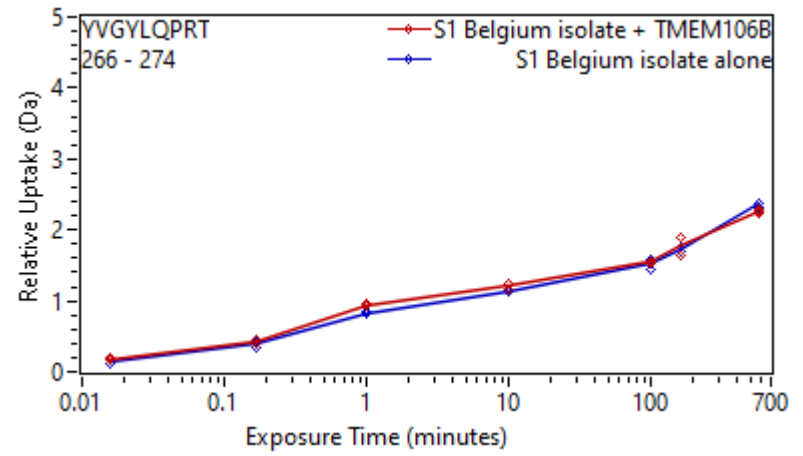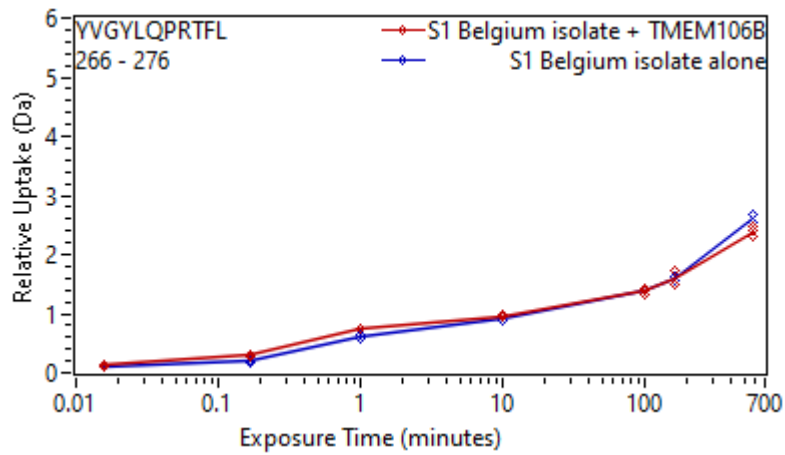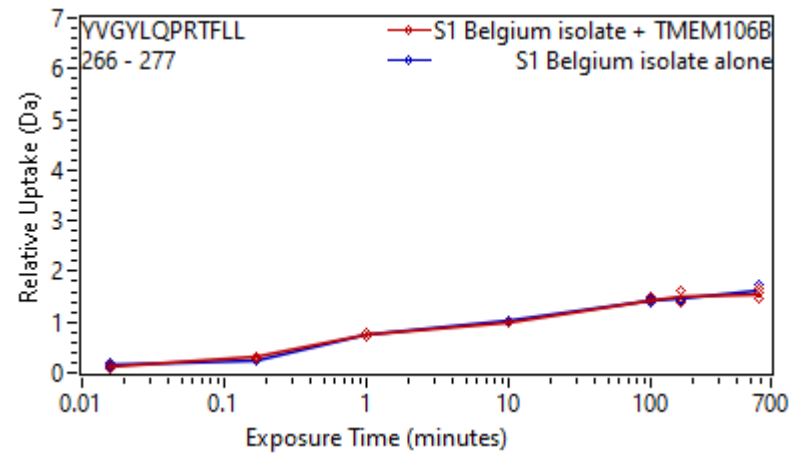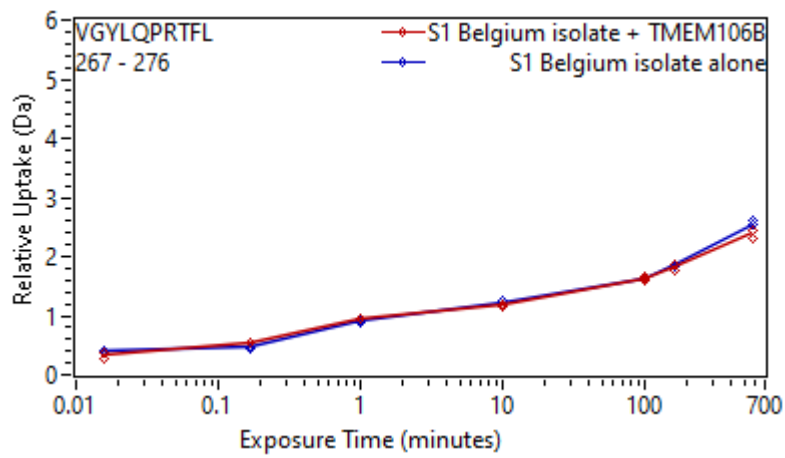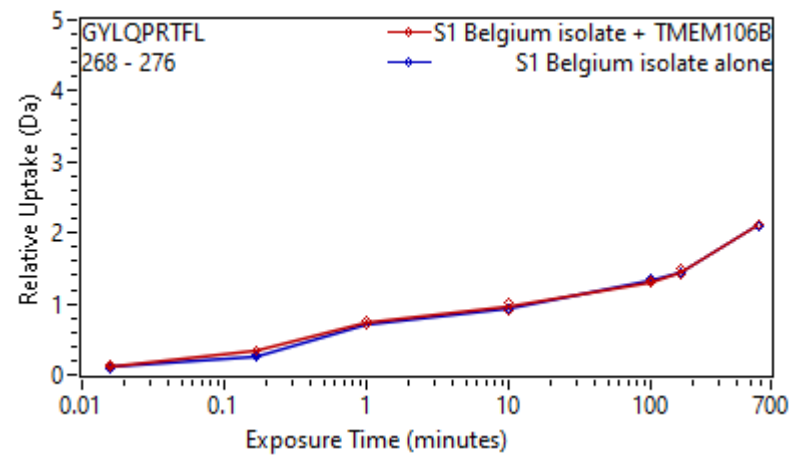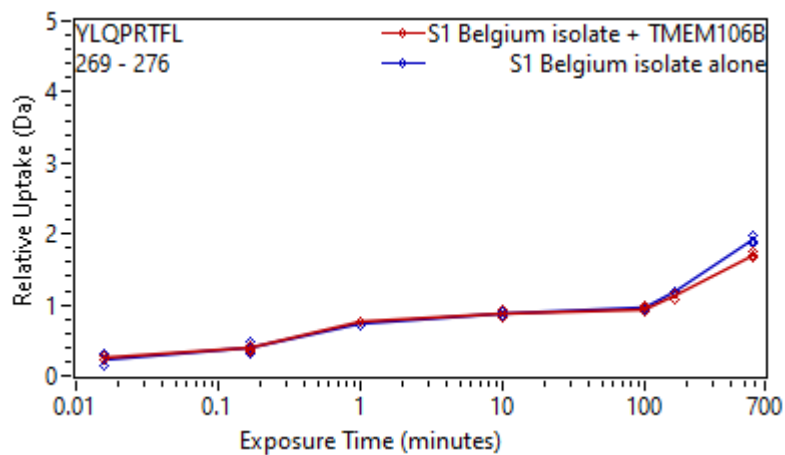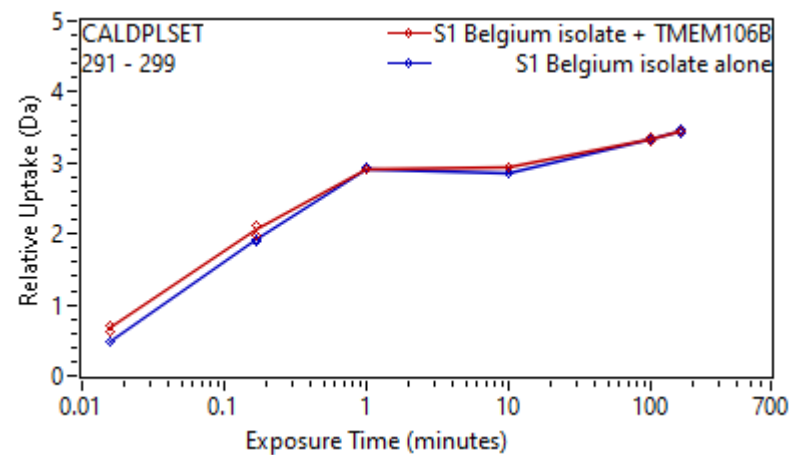

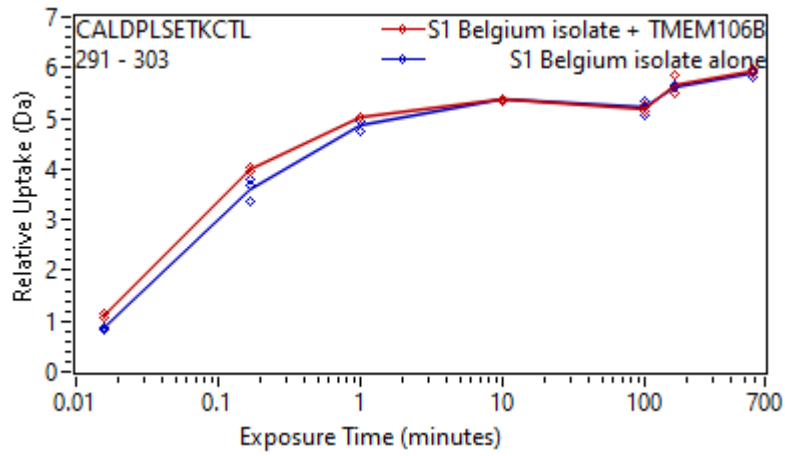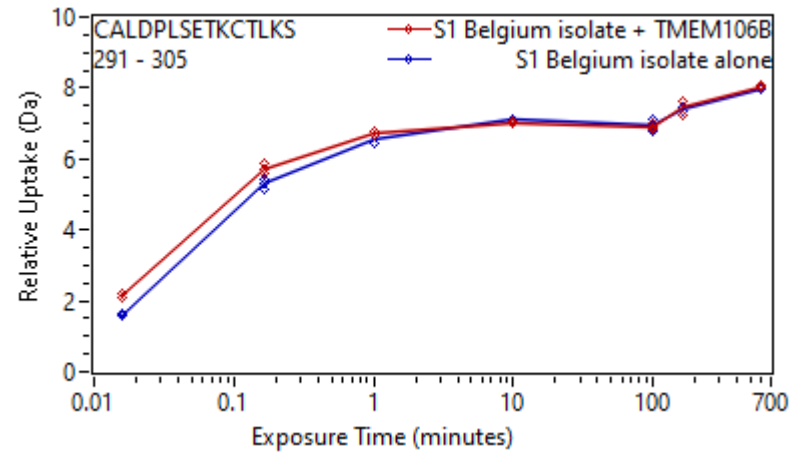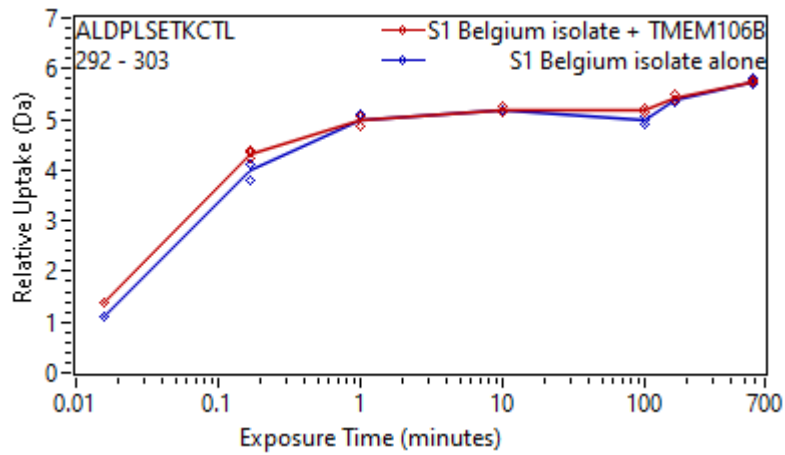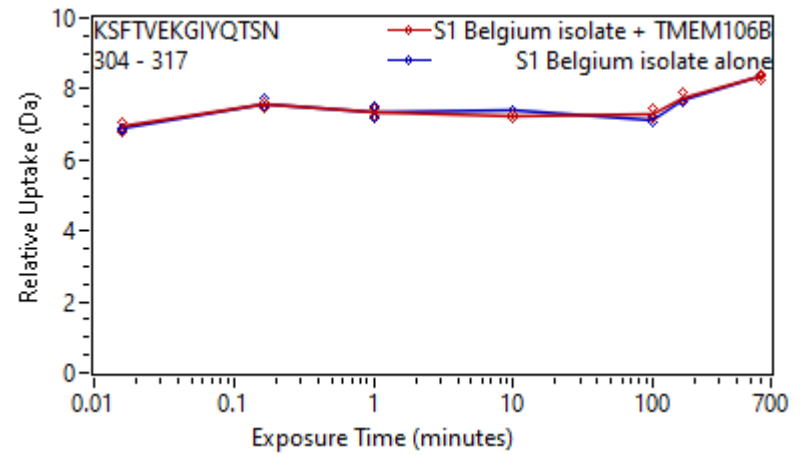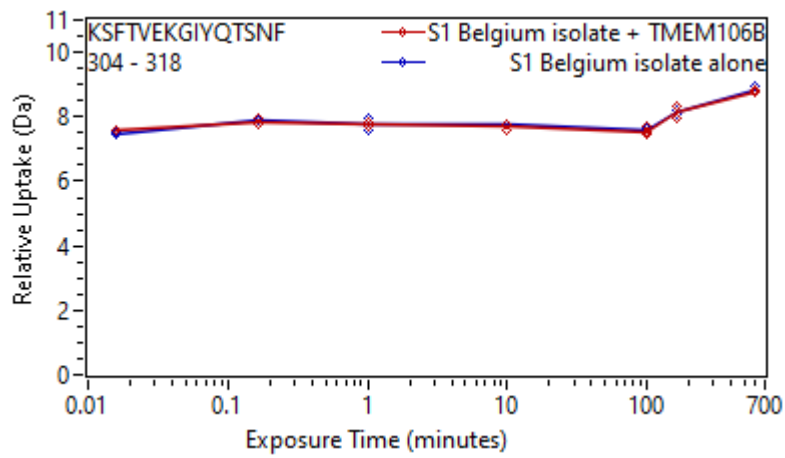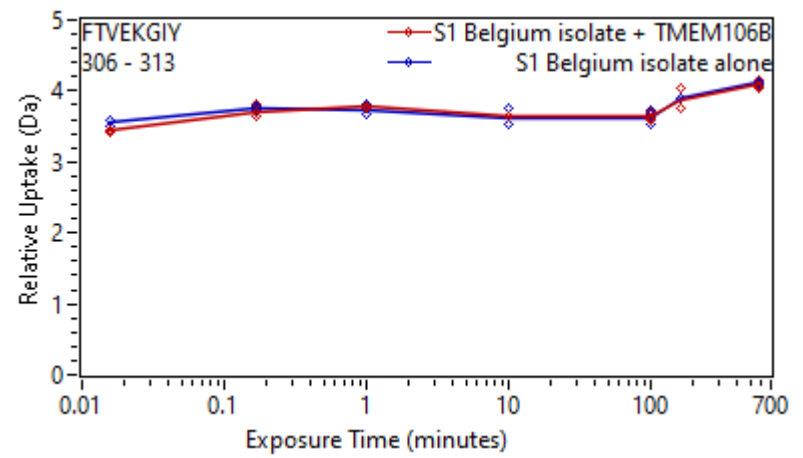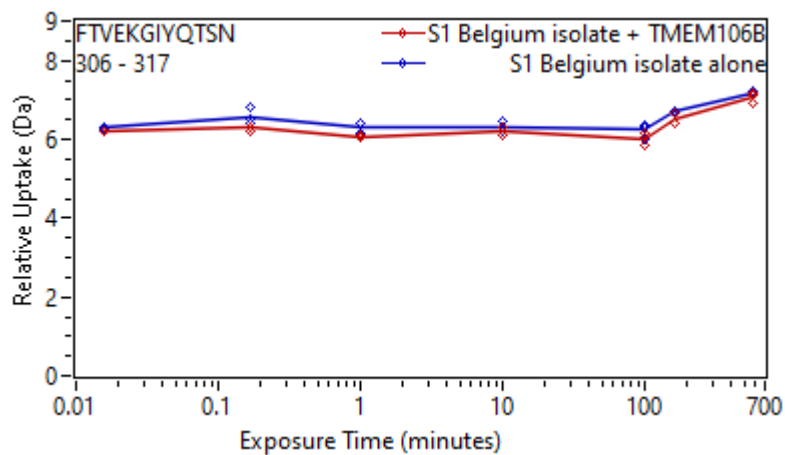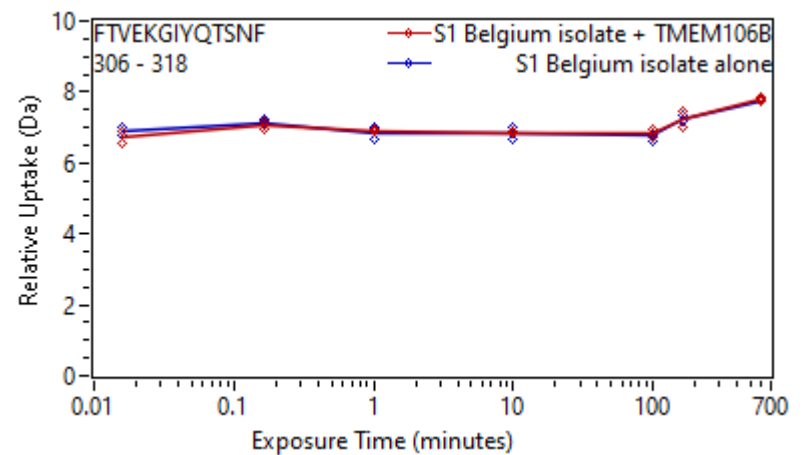

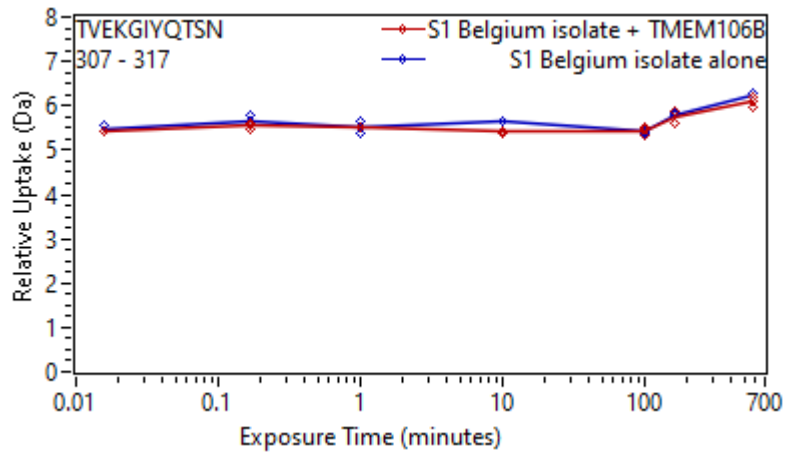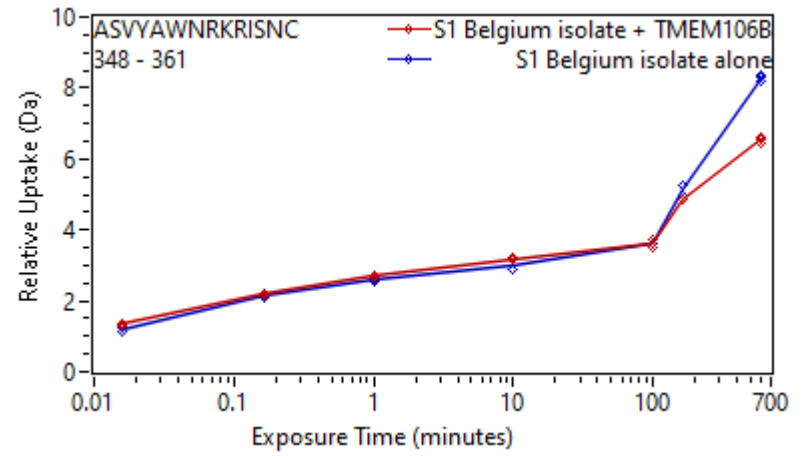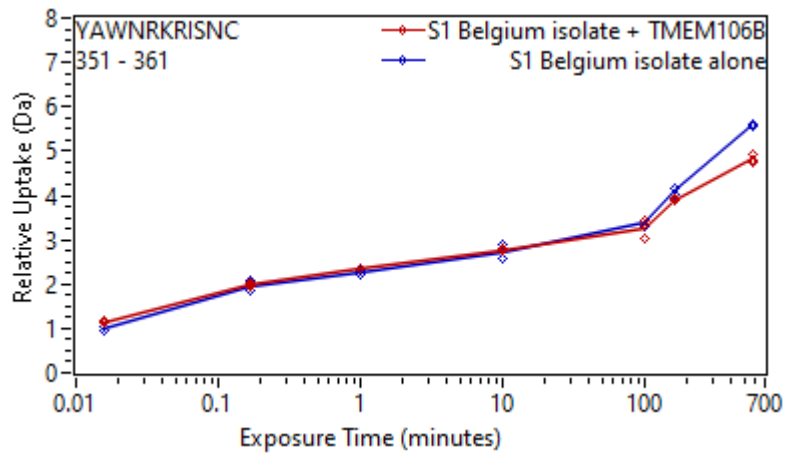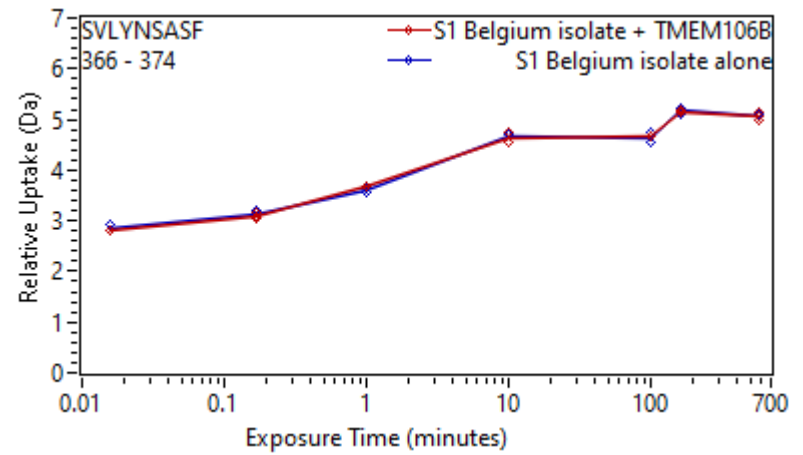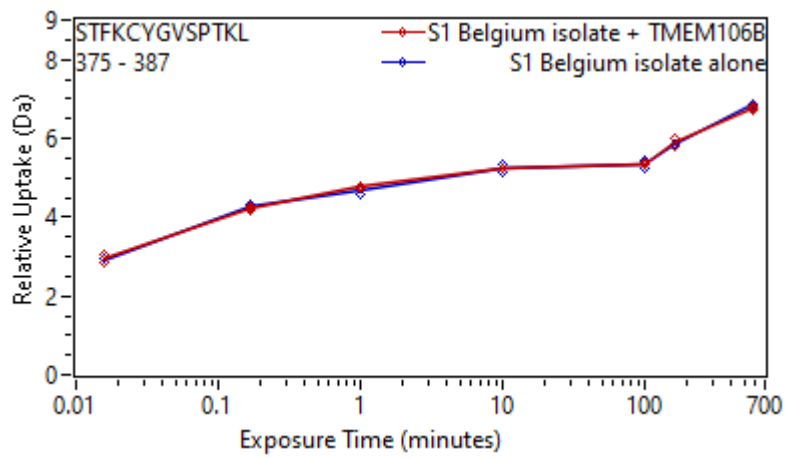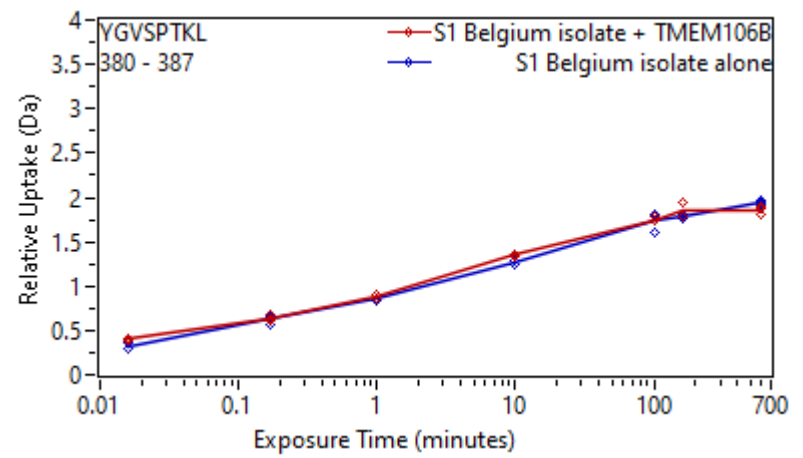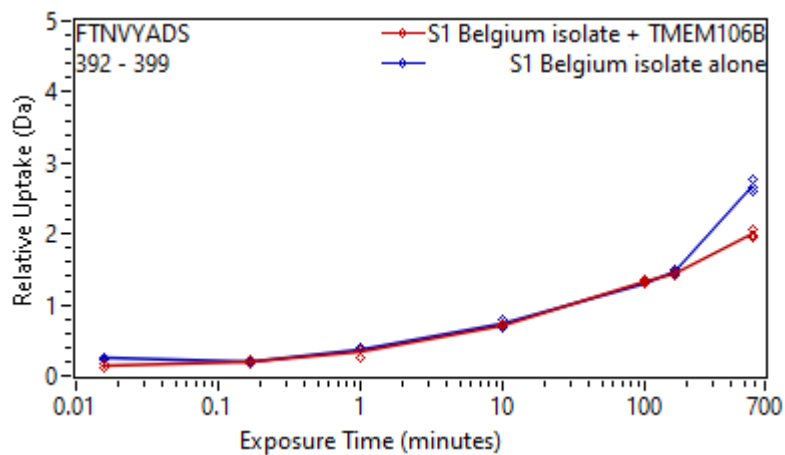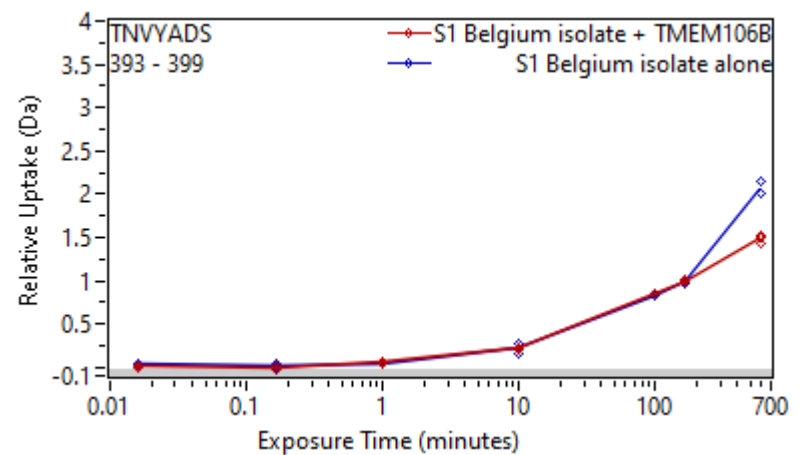

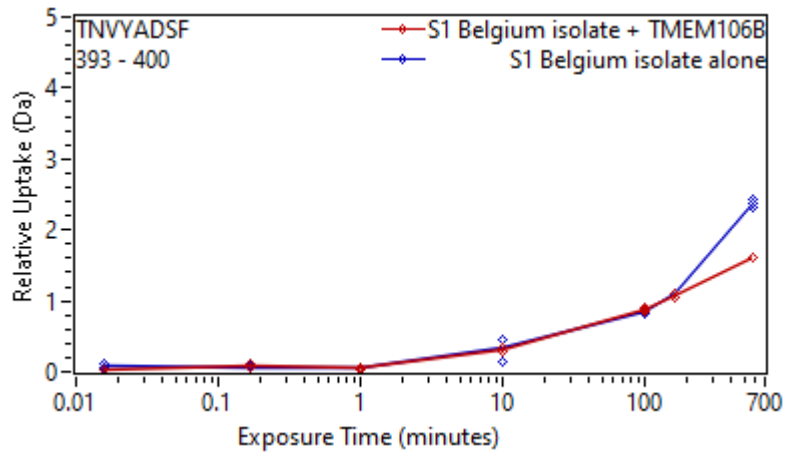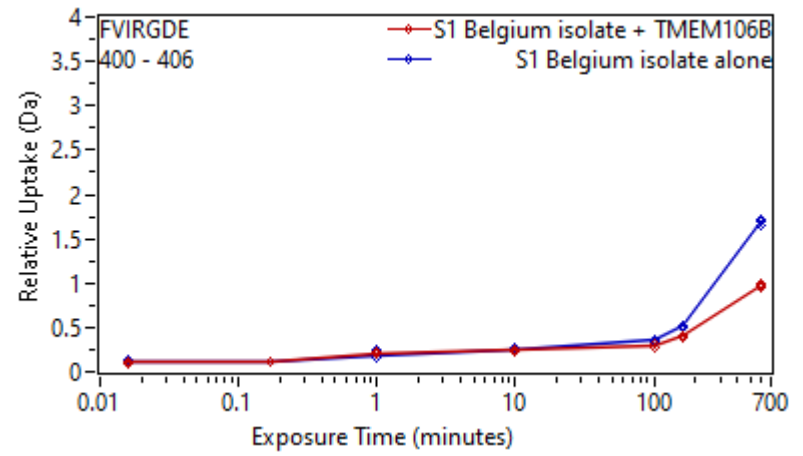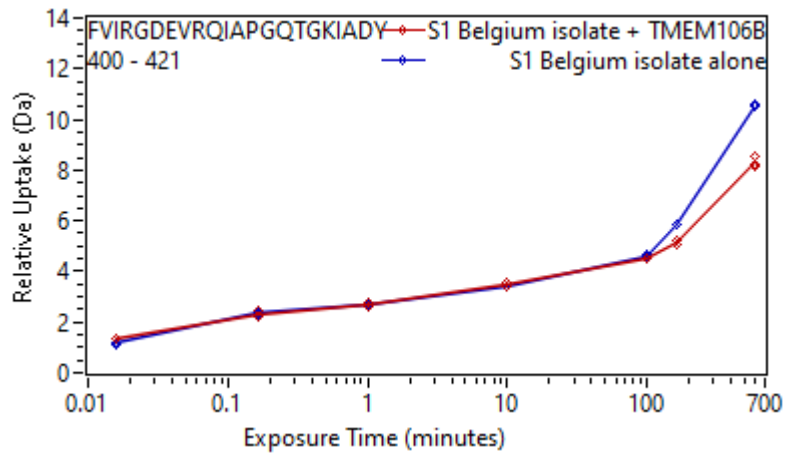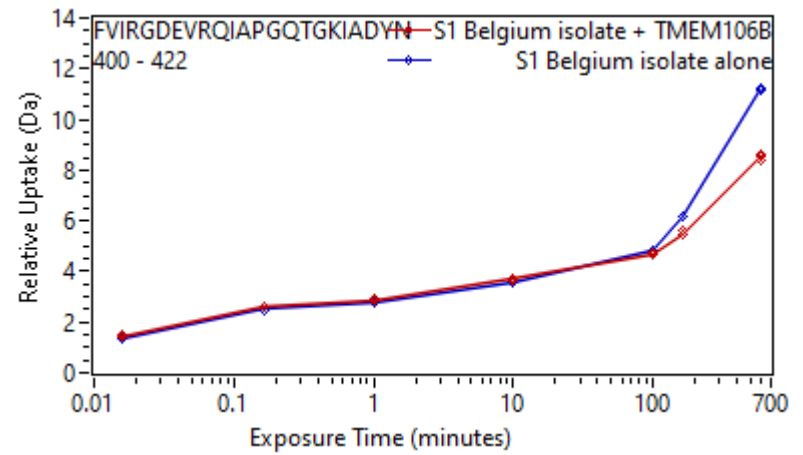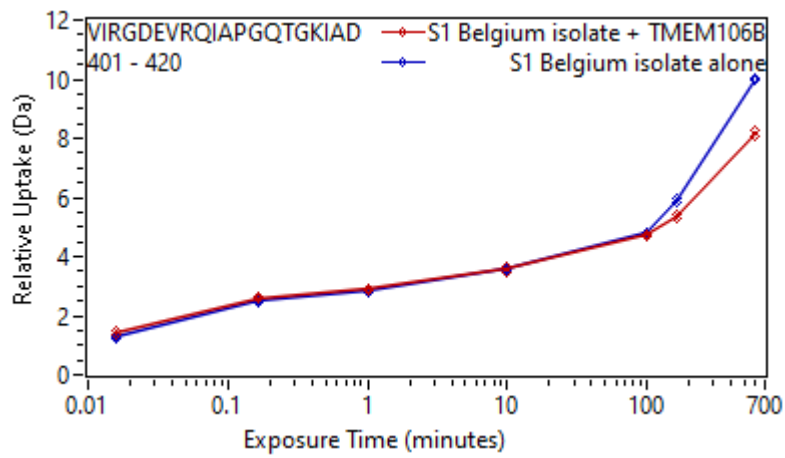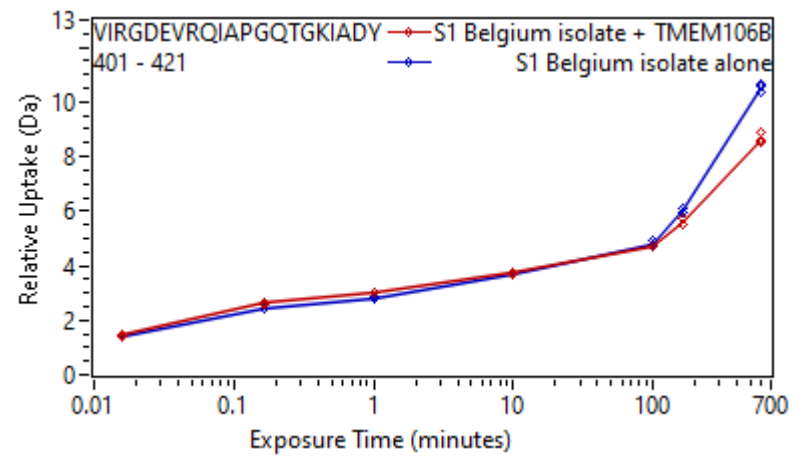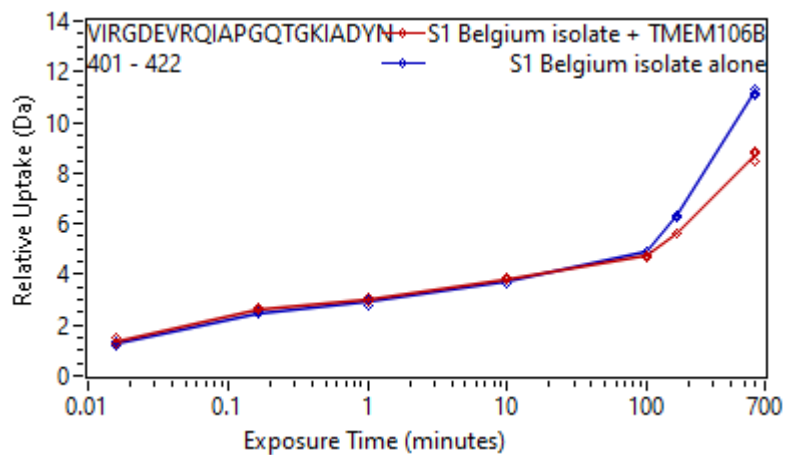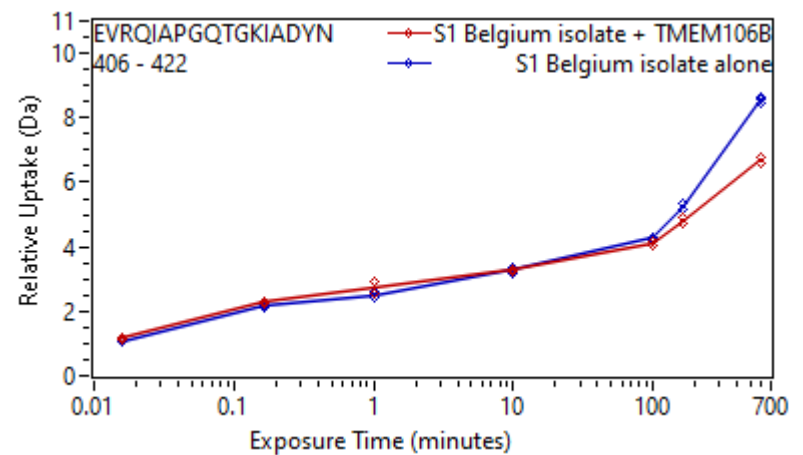

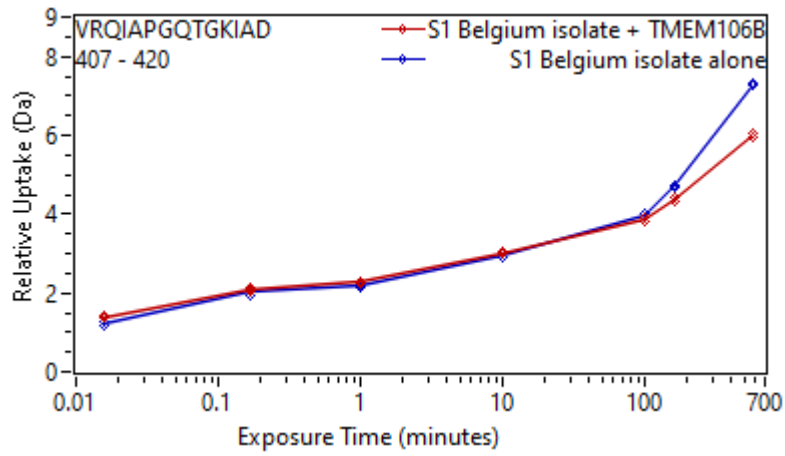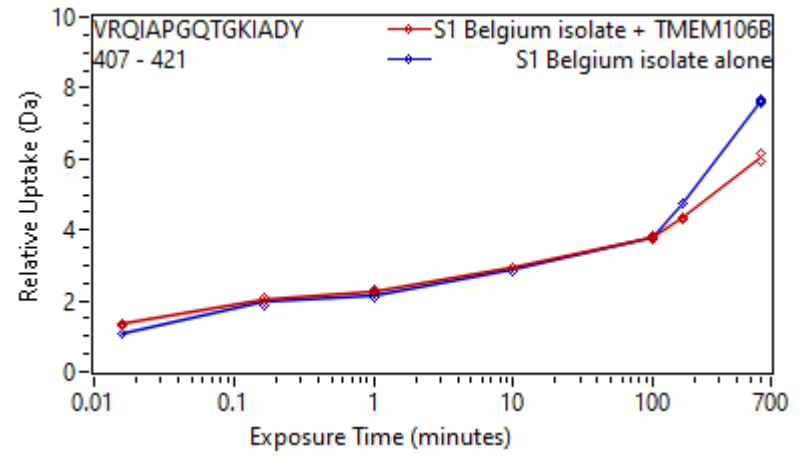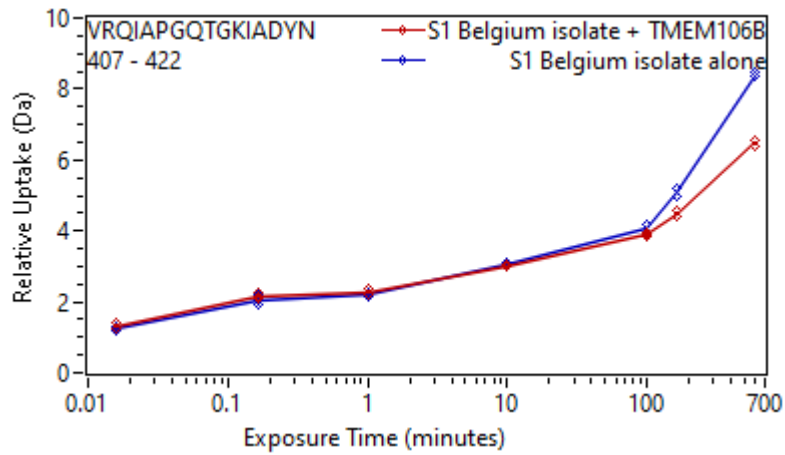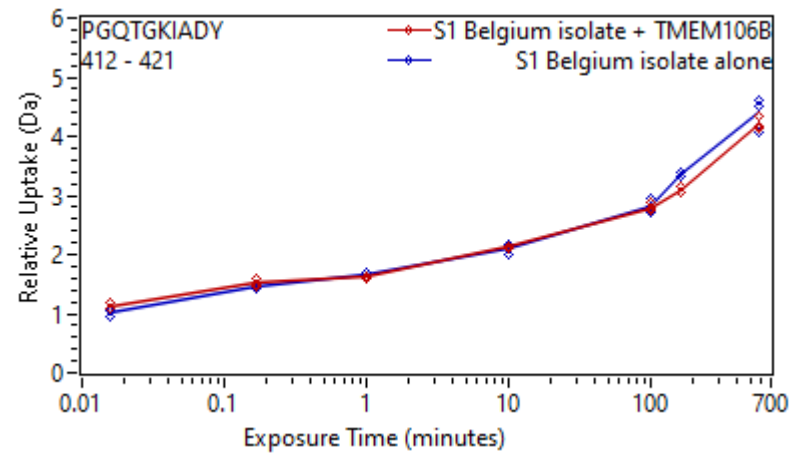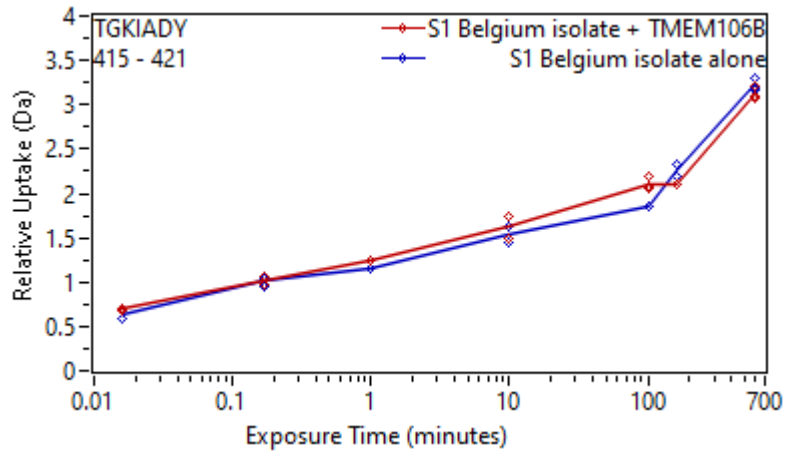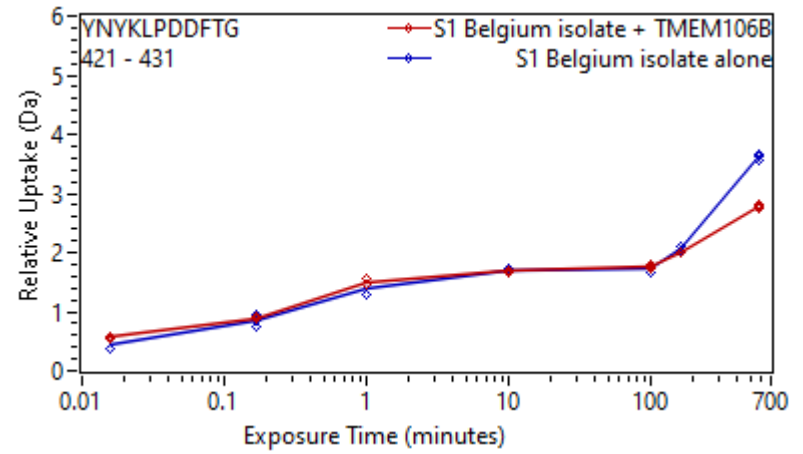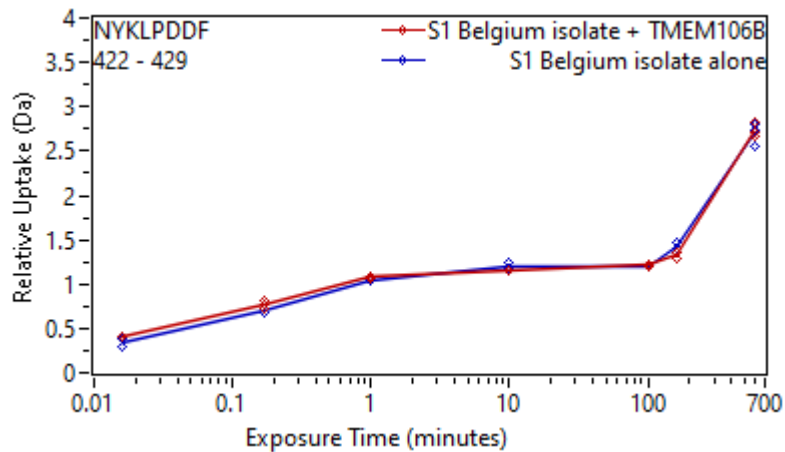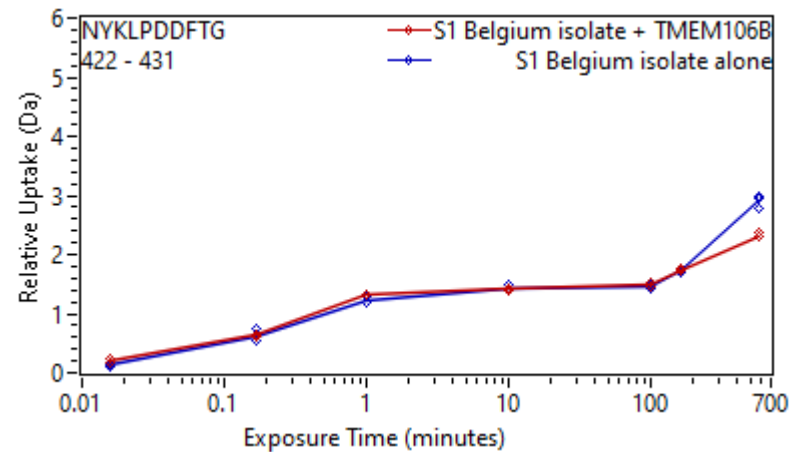

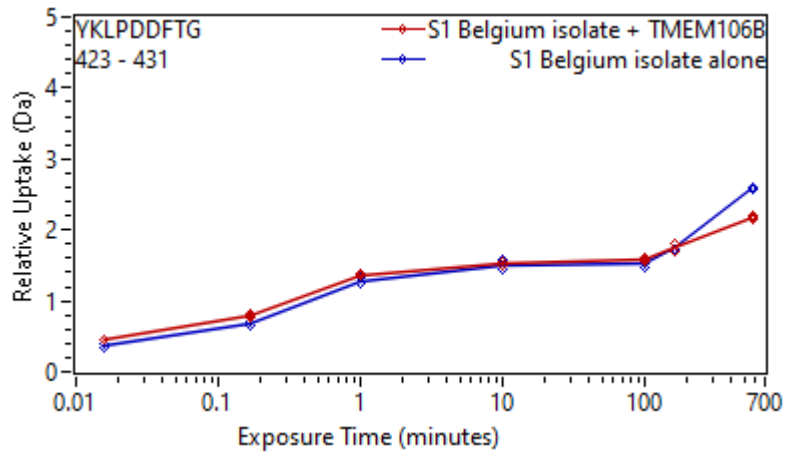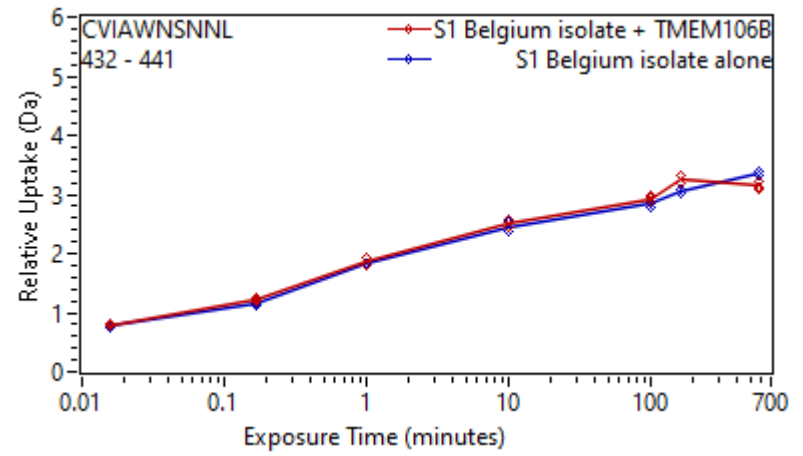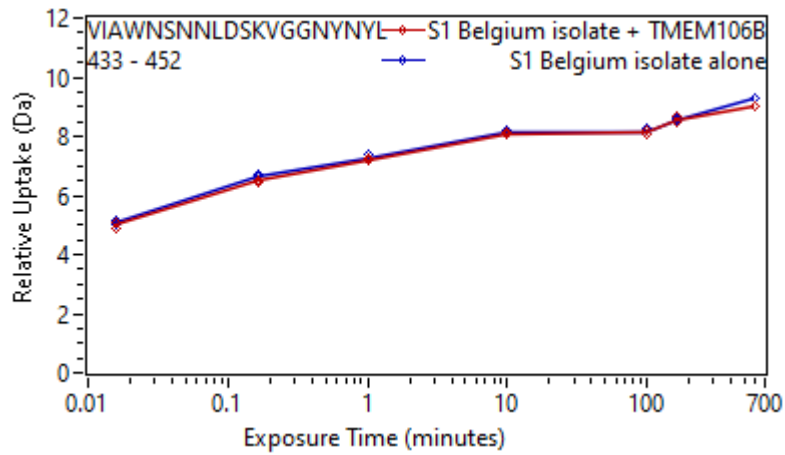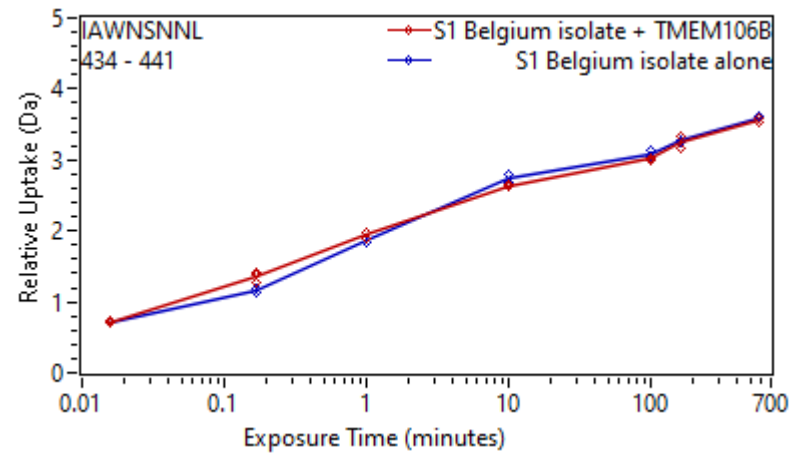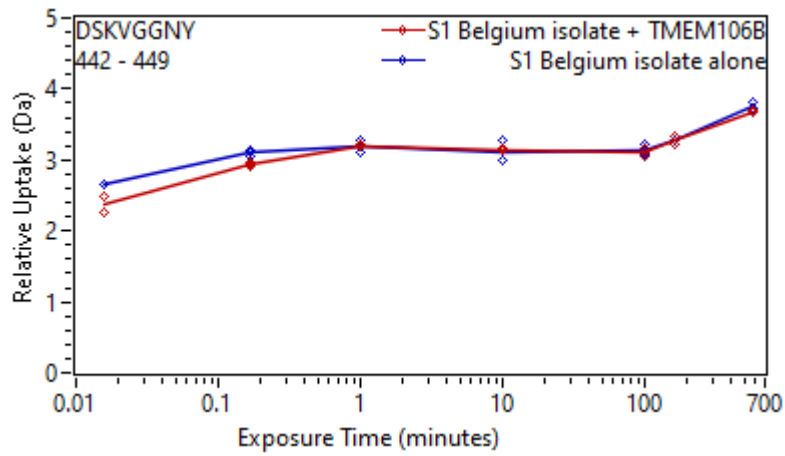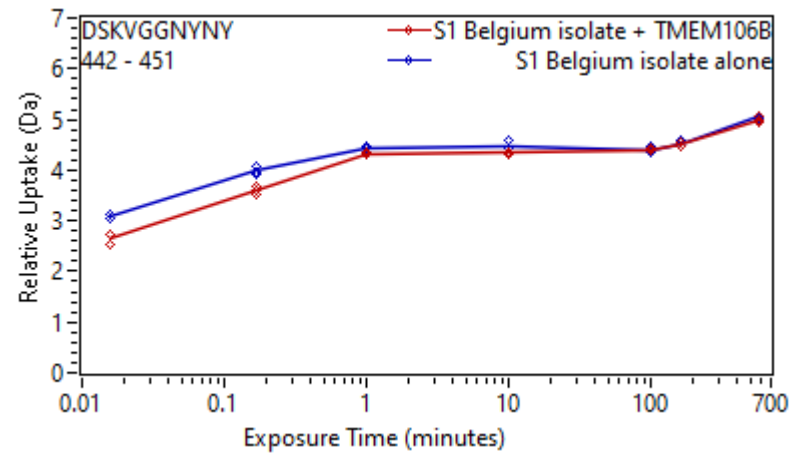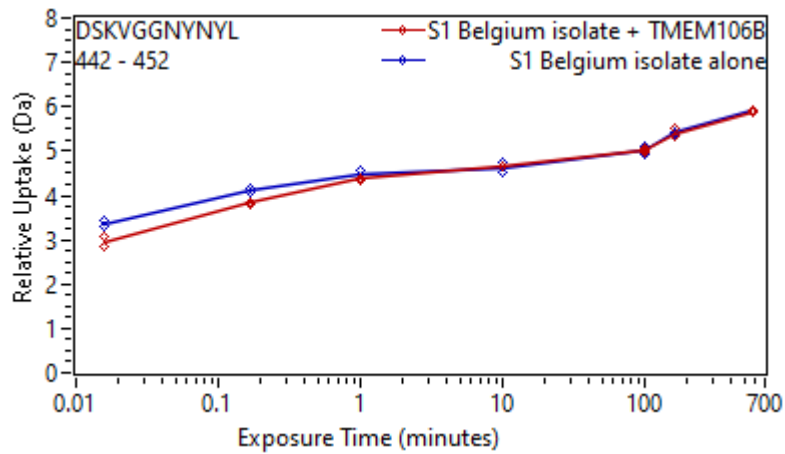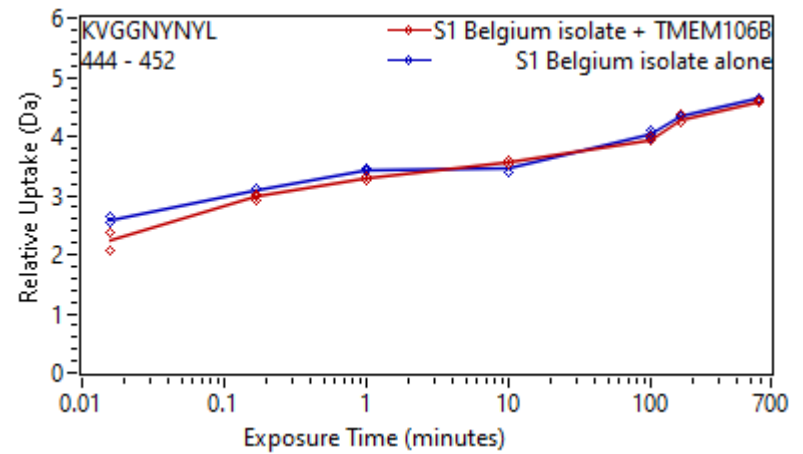



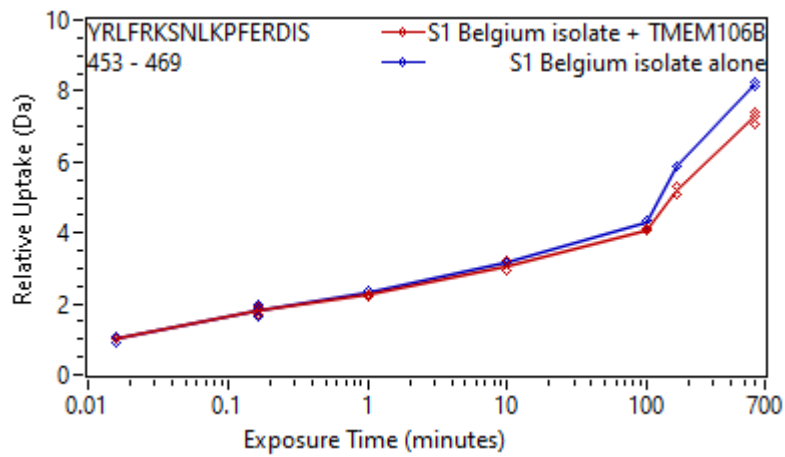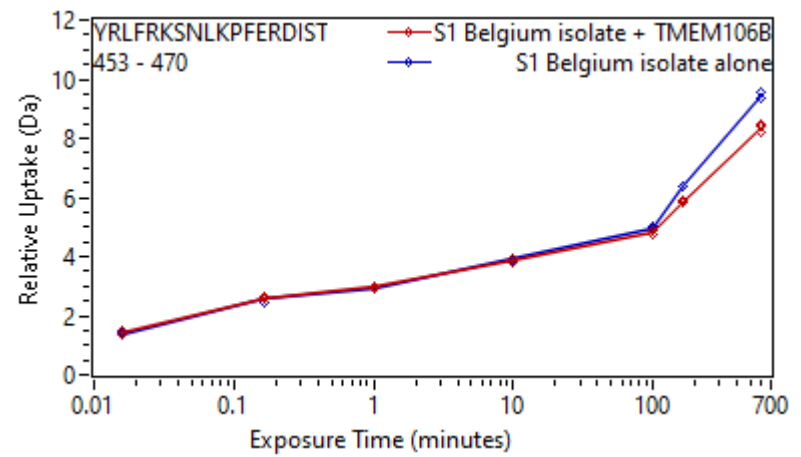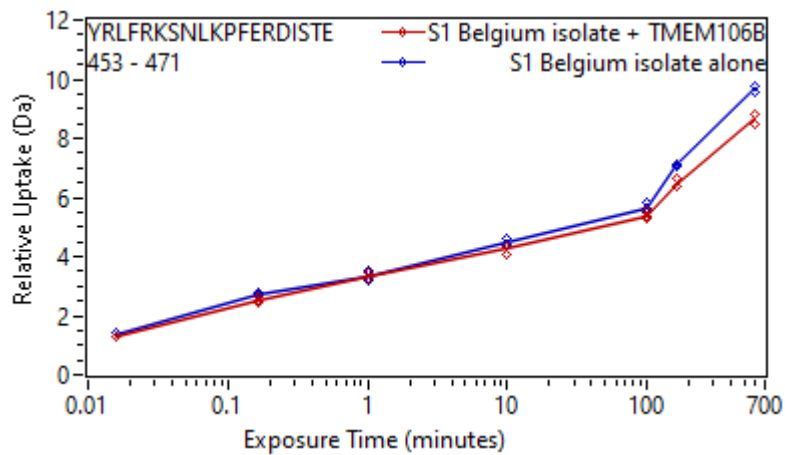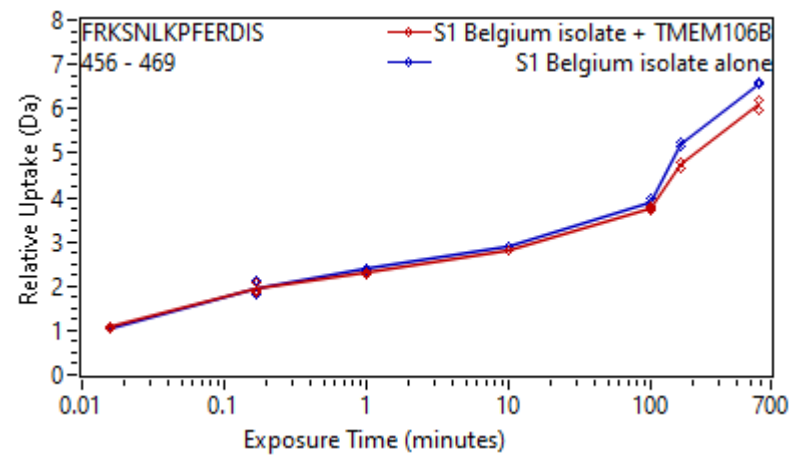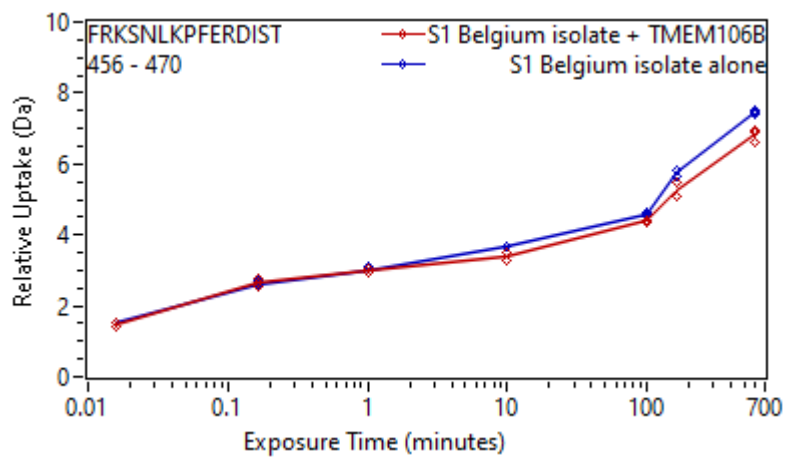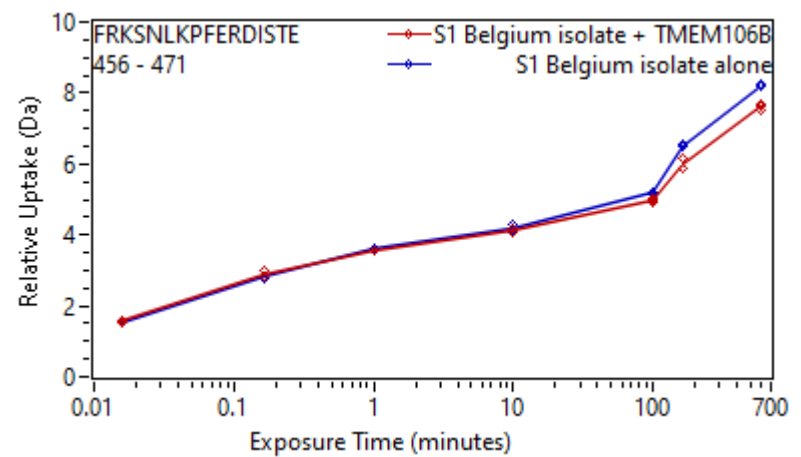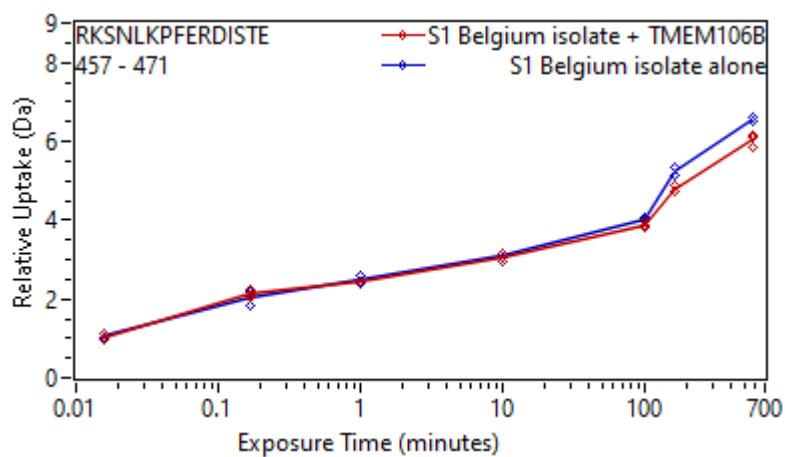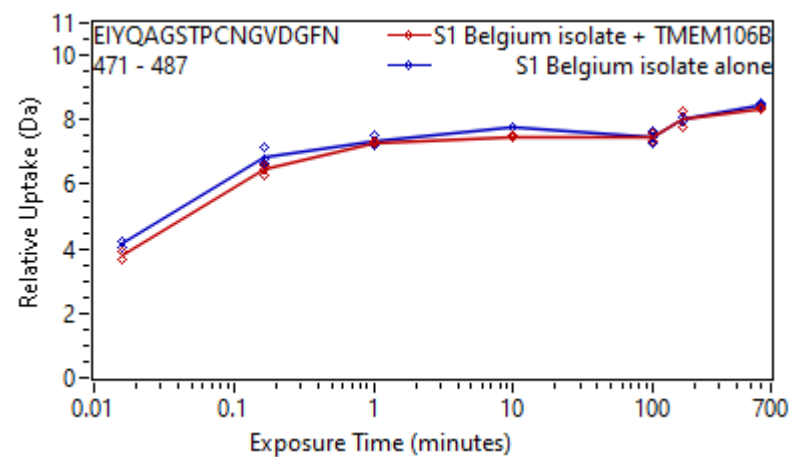

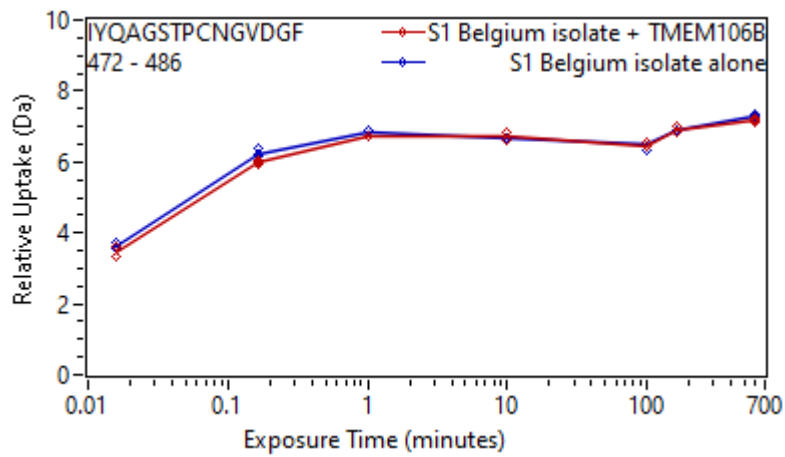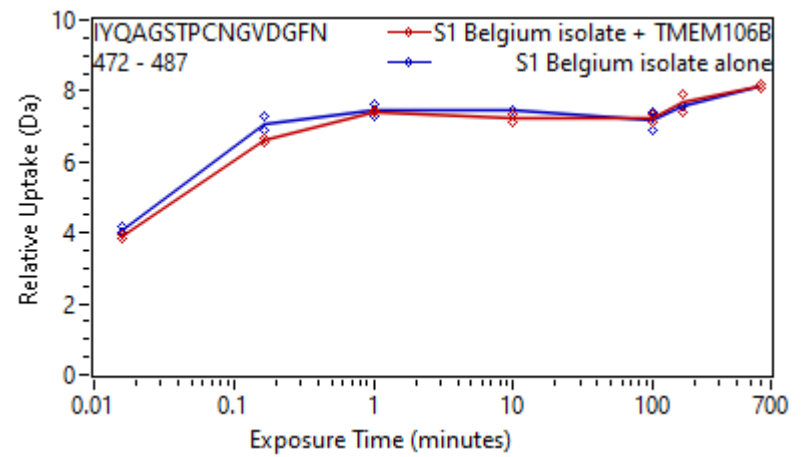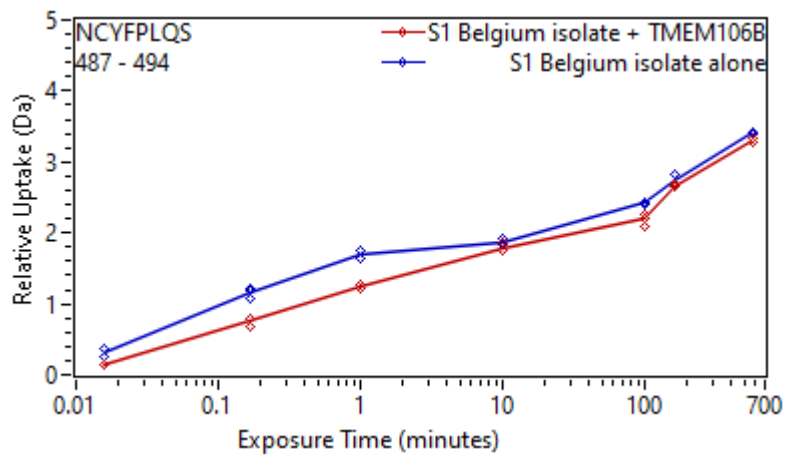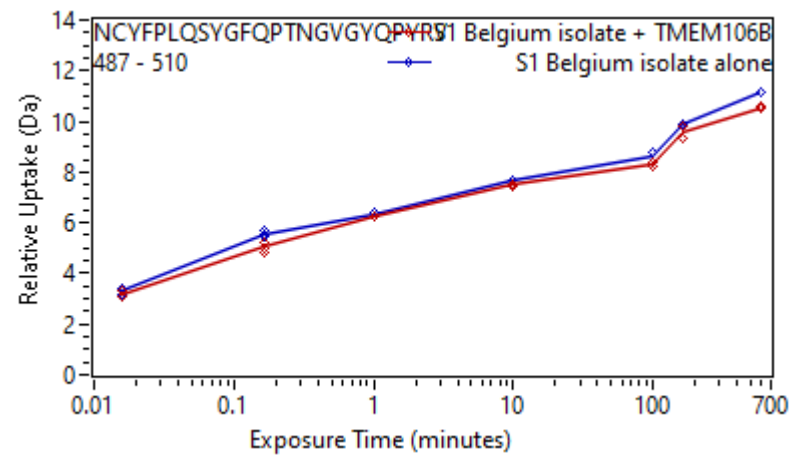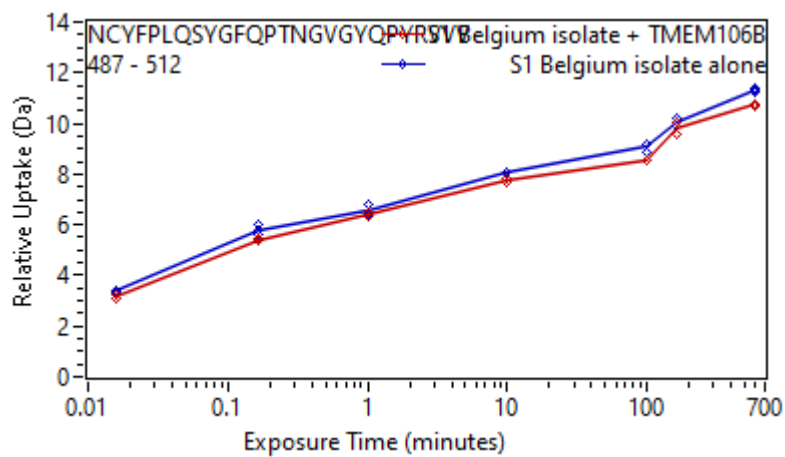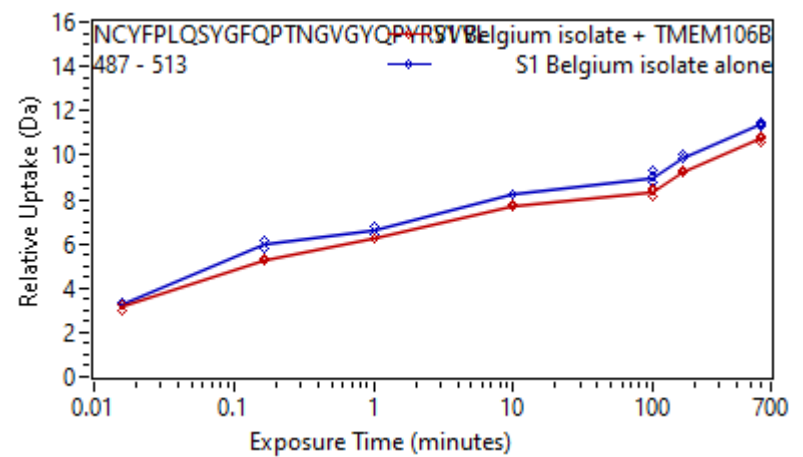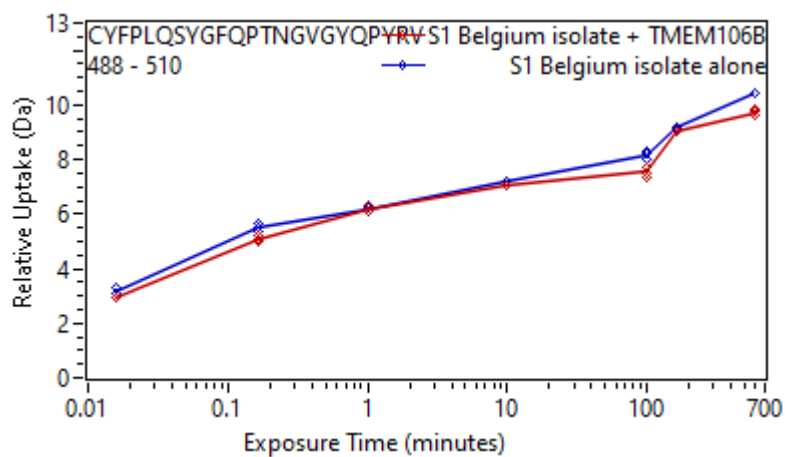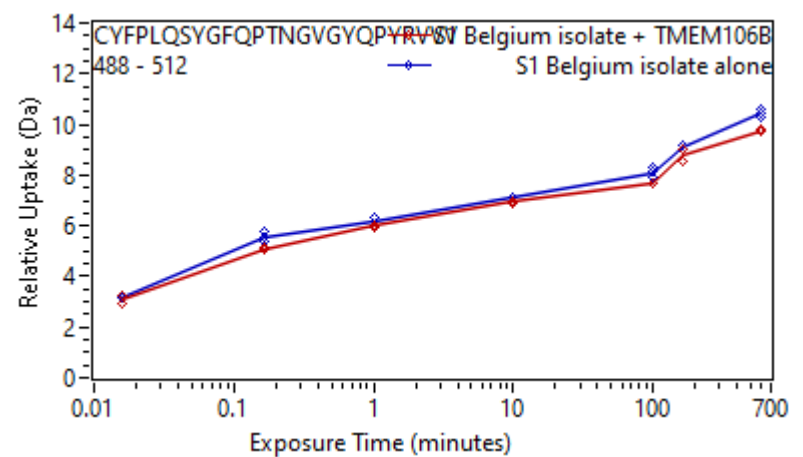

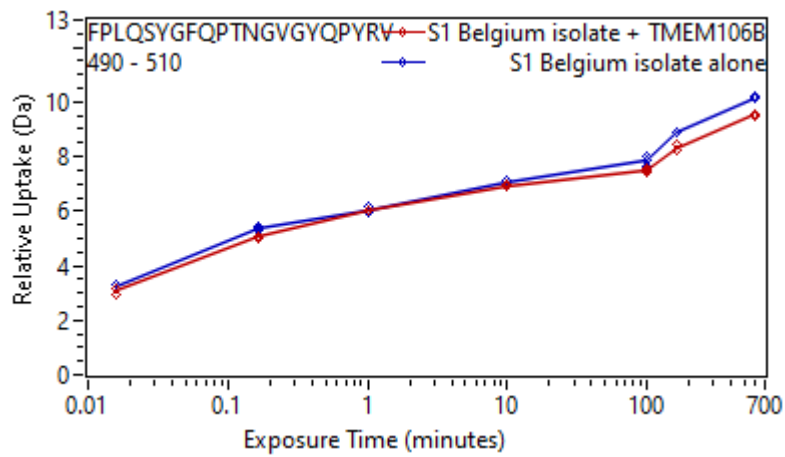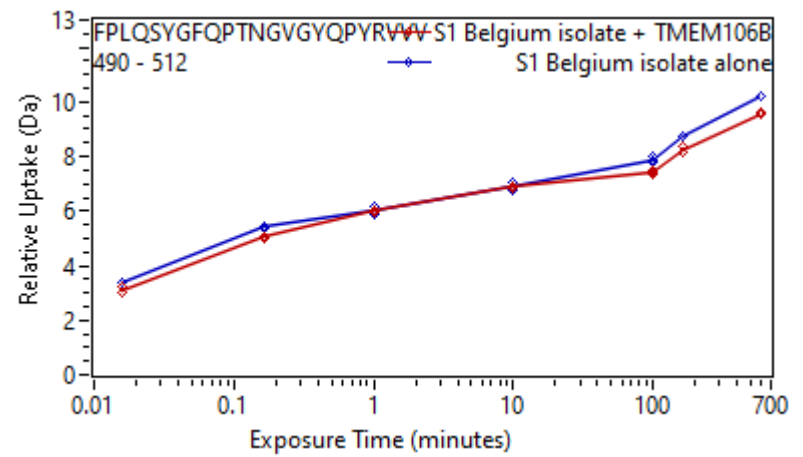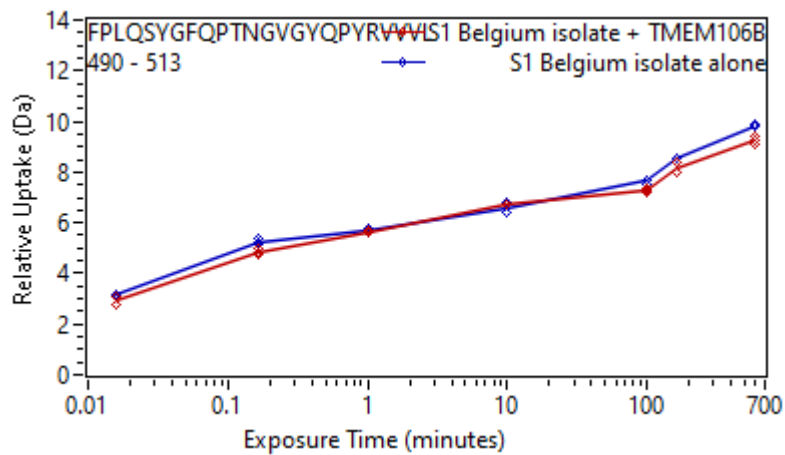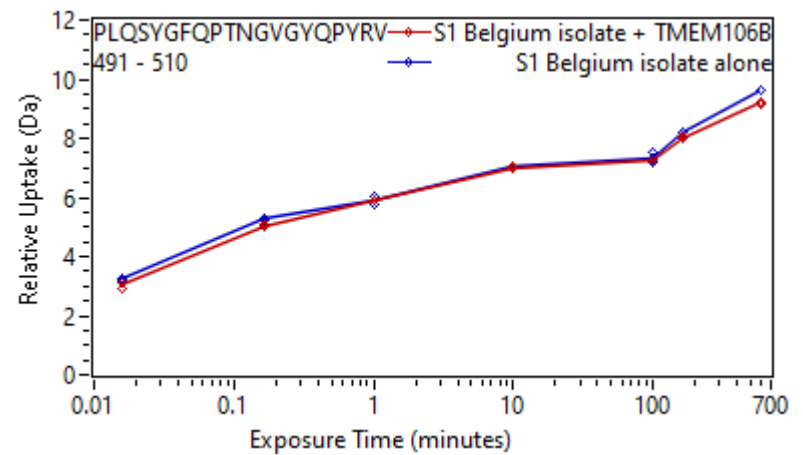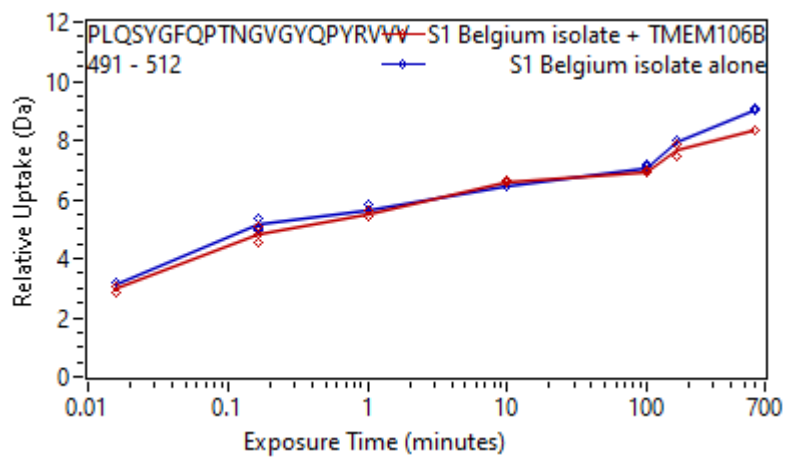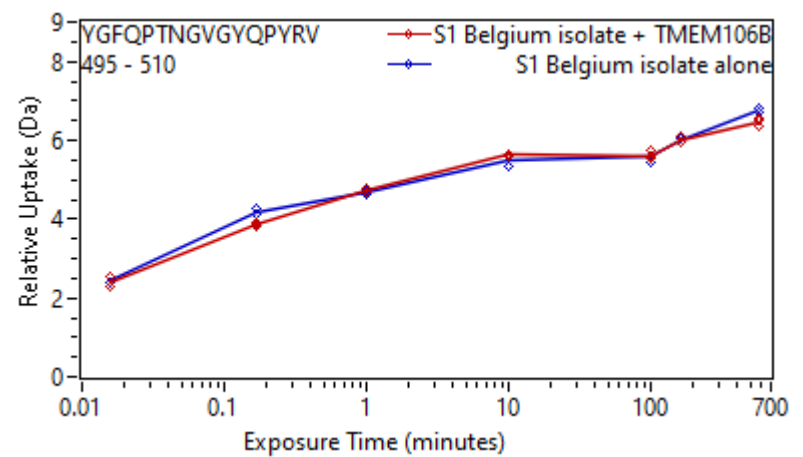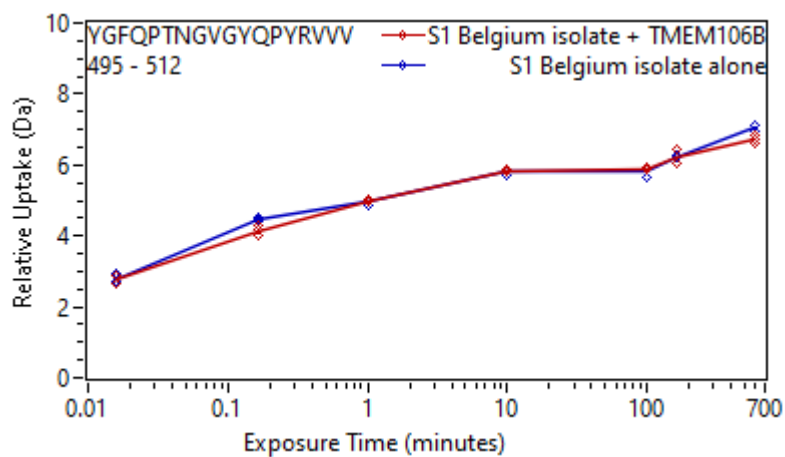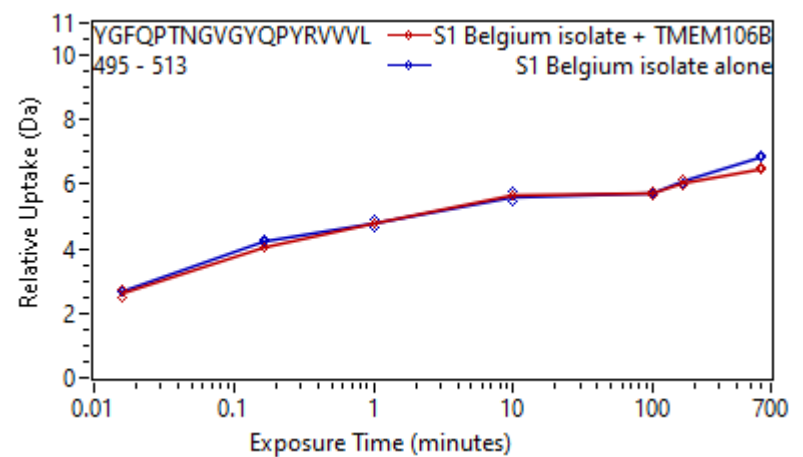

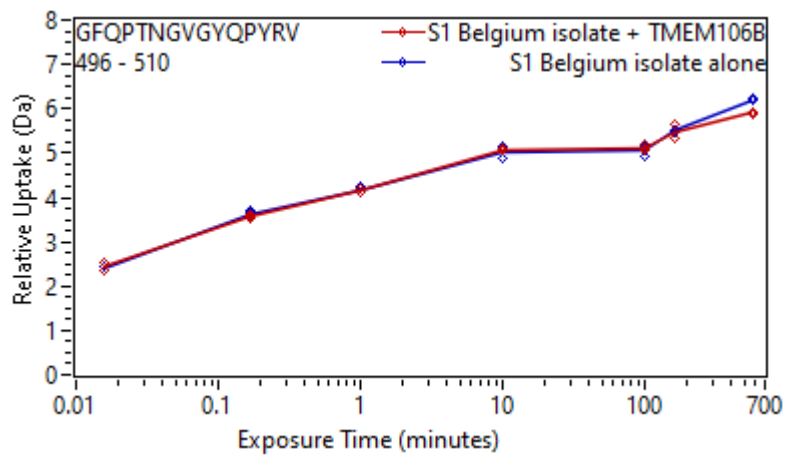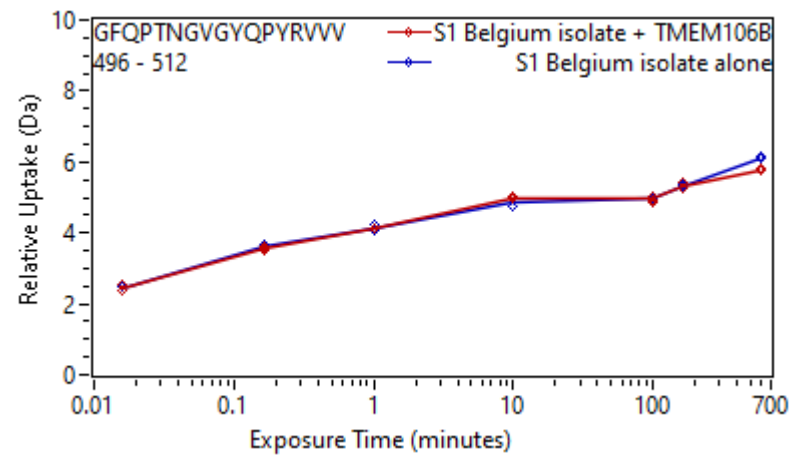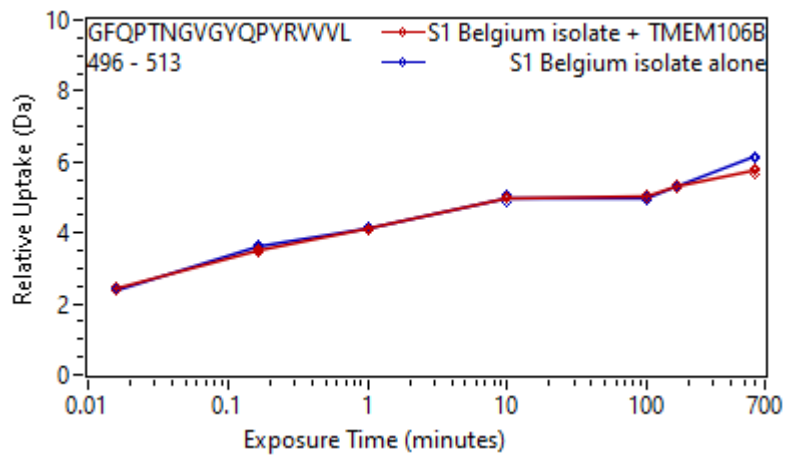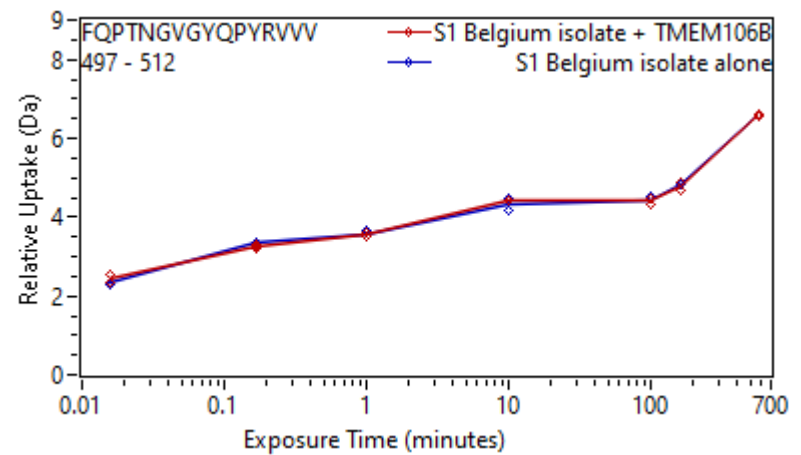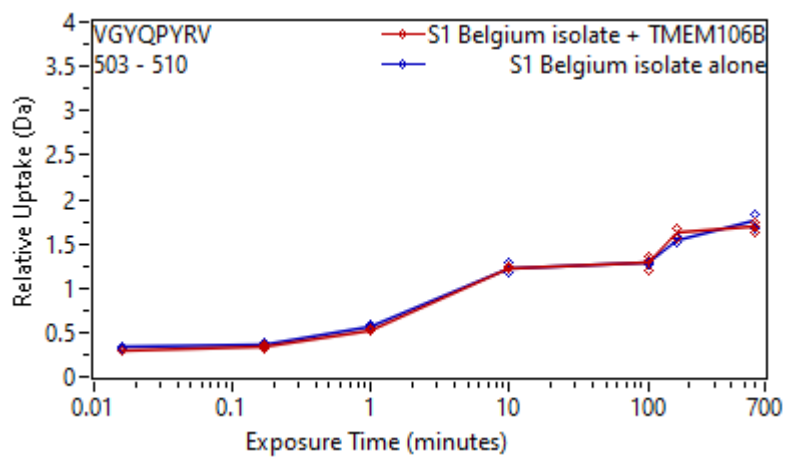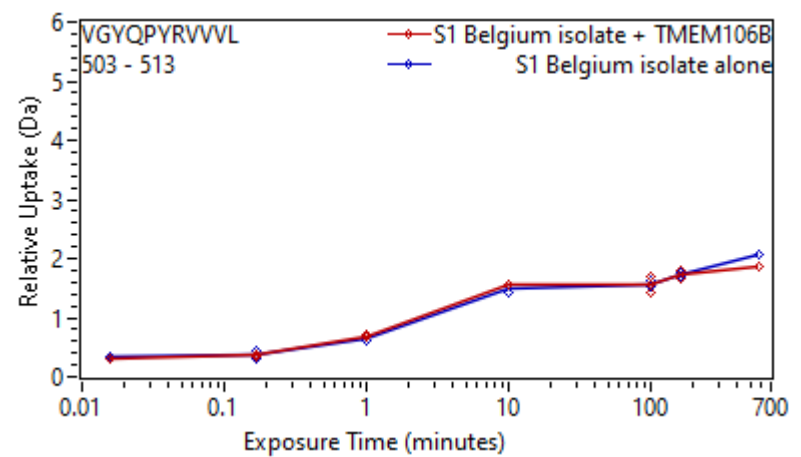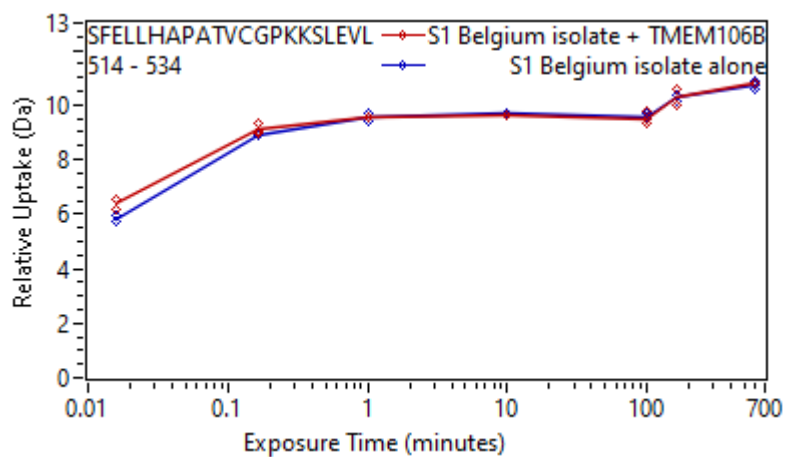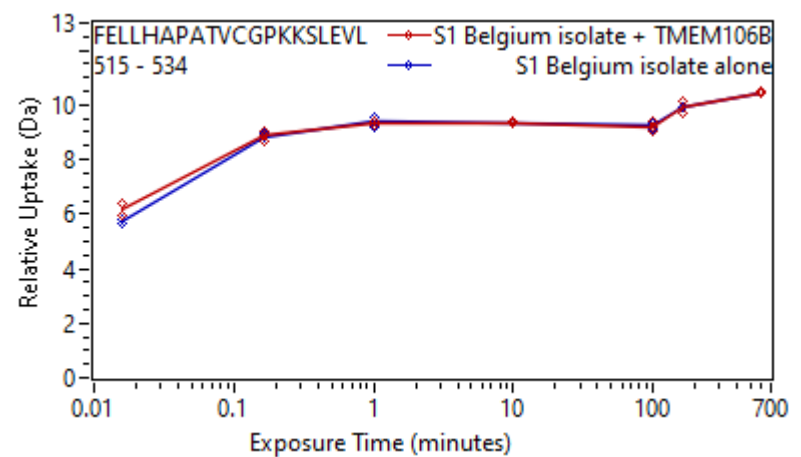

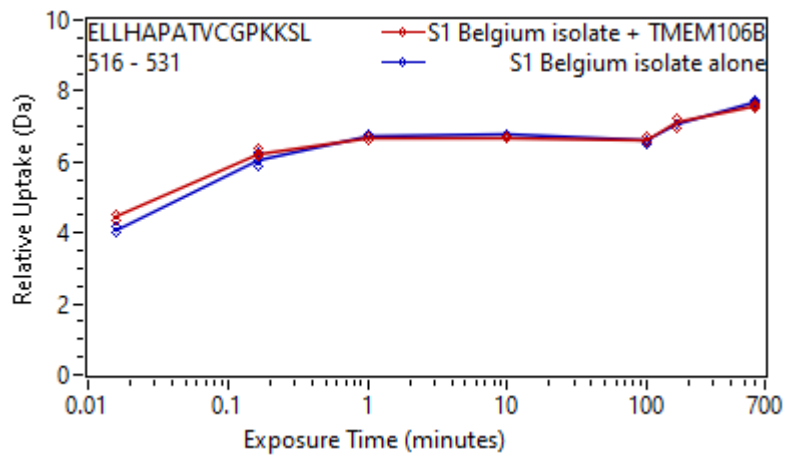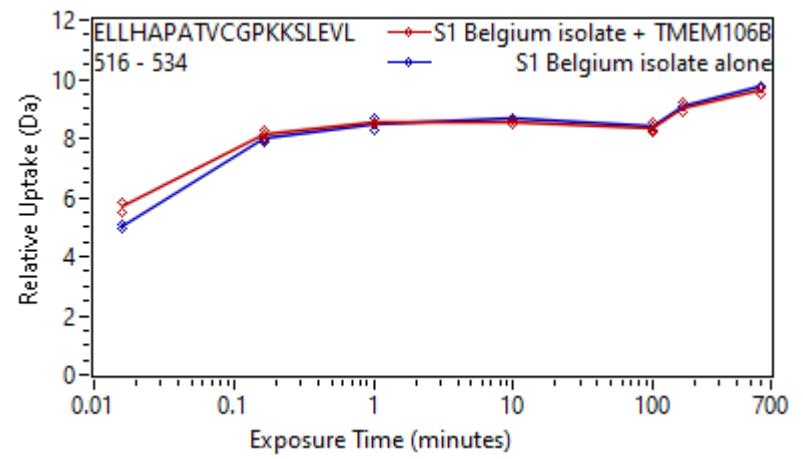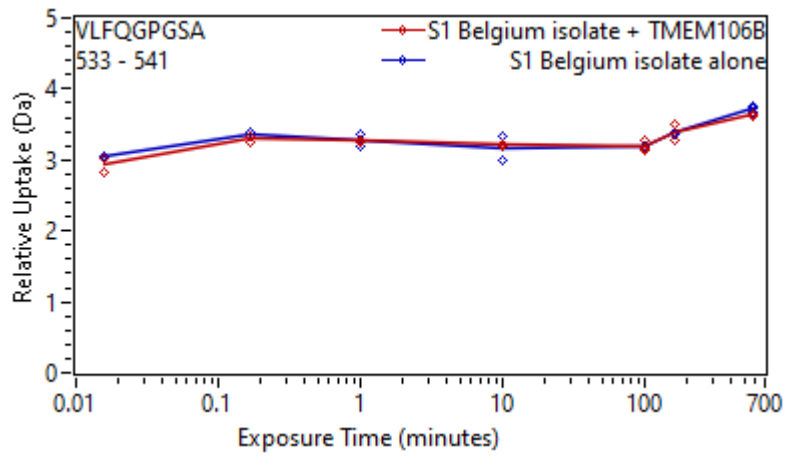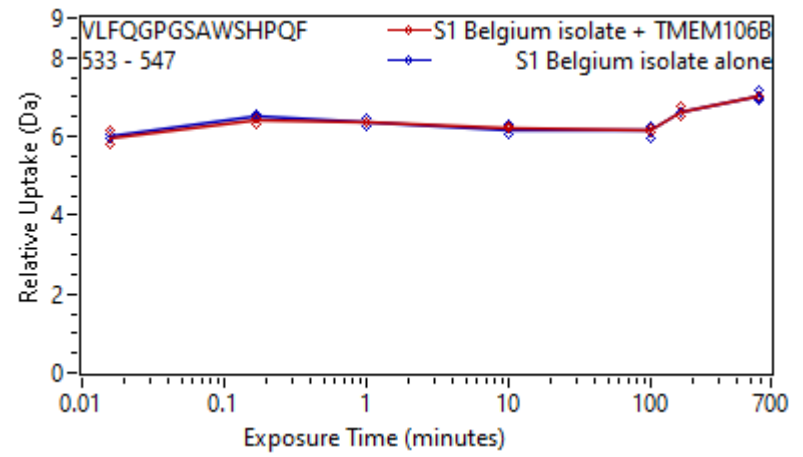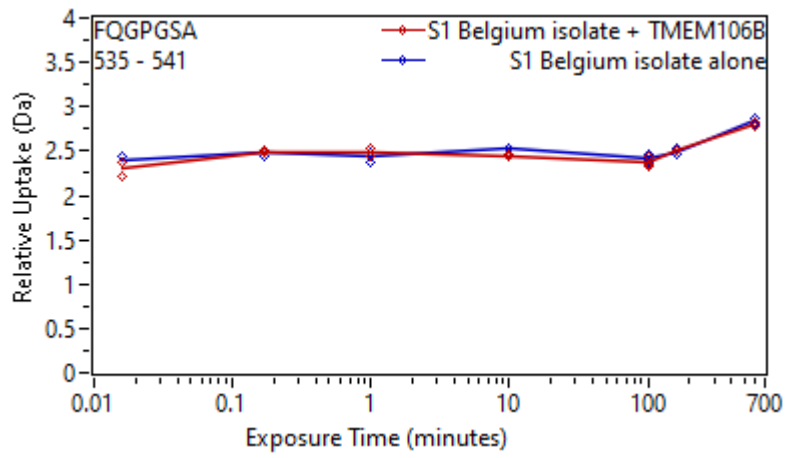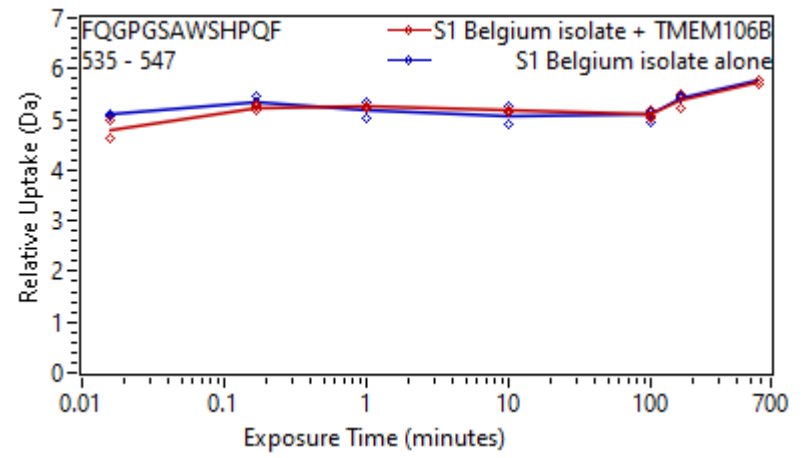

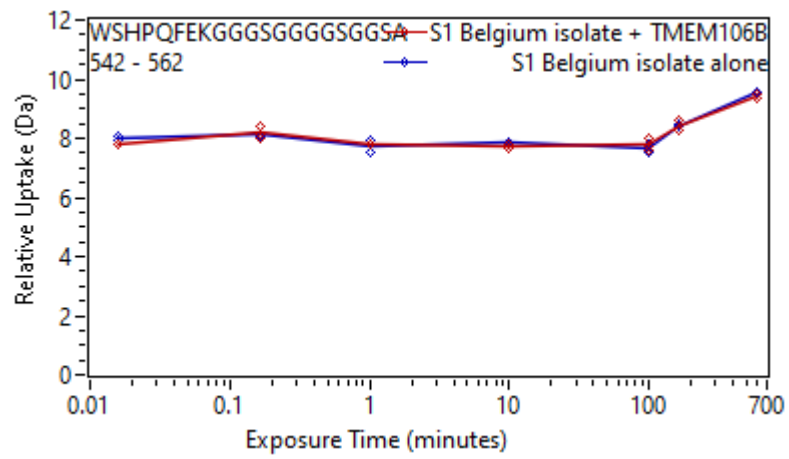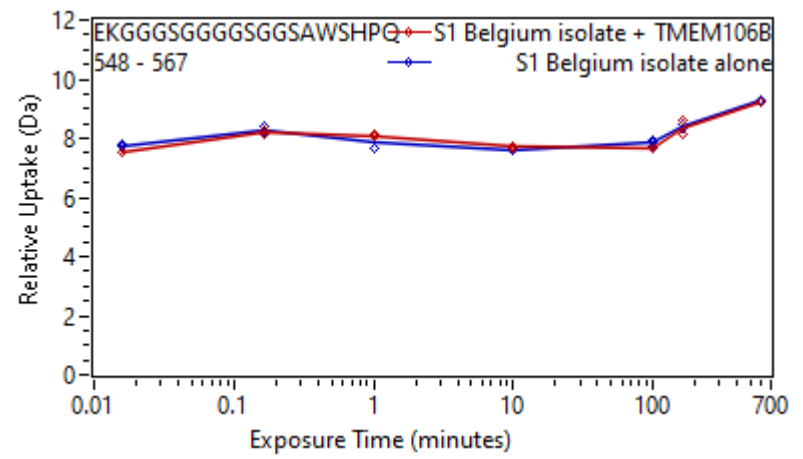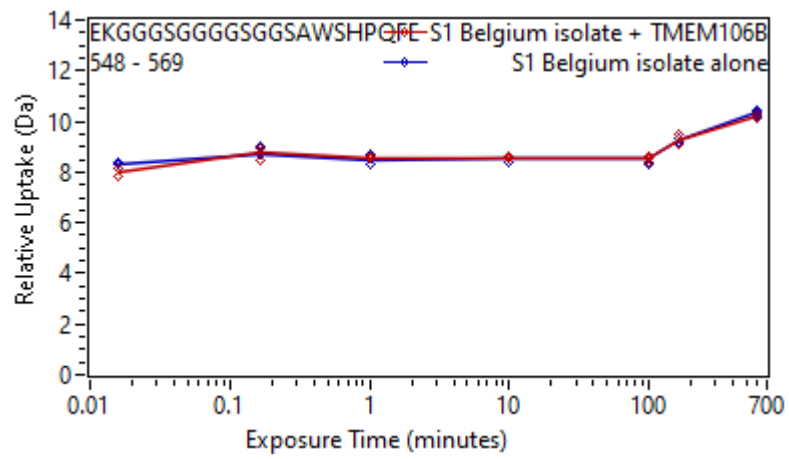

Supplement: mmc4.pdf [file mmc4.pdf]
